# Supplementary material for: Discovery of 5-trifluoromethyl-2-aminopyrimidine derivatives as potent dual inhibitors of FLT3 and CHK1
Source: Royal Society of Chemistry journal article supplement (doi:10.1039/d3md00597f), 2023-12-07
Supplement: d3md00597f1.pdf [file d3md00597f1.pdf]

## Discovery of 5-trifluoromethyl-2-aminopyrimidine derivatives as potent dual inhibitors of FLT3 and CHK1

Minjie Deng,<sup>‡a</sup> Yue Gao,<sup>‡bc</sup> Peipei Wang,<sup>bc</sup> Wenjing Du,<sup>a</sup> Gaoya Xu,<sup>bc</sup> Jia Li,<sup>bcd</sup> Yubo Zhou,<sup>\*ce</sup> Tao Liu<sup>\*afg</sup>

<sup>a</sup> ZJU-ENS Joint Laboratory of Medicinal Chemistry, College of Pharmaceutical Sciences, Zhejiang University, Zijingang Campus, Hangzhou 310058, P.R. China

<sup>b</sup> School of Chinese Materia Medica, Nanjing University of Chinese Medicine, Nanjing, 210023, P.R. China

<sup>c</sup> State Key Laboratory of Chemical Biology, Shanghai Institute of Materia Medica, Chinese Academy of Sciences, Shanghai 201203, P.R. China

<sup>d</sup> Shandong Laboratory of Yantai Drug Discovery, Bohai Rim Advanced Research Institute for Drug Discovery, Yantai 264117, P.R. China

<sup>e</sup> Zhongshan Institute for Drug Discovery, Shanghai Institute of Materia Medica, Chinese Academy of Sciences, Zhongshan 528400, P.R. China

<sup>f</sup> Hangzhou Institute of Innovative Medicine, Institute of Drug Discovery and Design, Zhejiang University, Hangzhou 310058, P.R. China

<sup>g</sup> National Key Laboratory of Advanced Drug Delivery and Release Systems, Zhejiang University, Hangzhou 310058, P.R. China

E-mail: [ybzhou@simm.ac.cn](mailto:ybzhou@simm.ac.cn), [lt601@zju.edu.cn](mailto:lt601@zju.edu.cn)

### Table of contents

|                                                 |           |
|-------------------------------------------------|-----------|
| <b>Title page</b>                               | <b>1</b>  |
| <b>NMR spectra of target compounds</b>          | <b>2</b>  |
| <b>HPLC methods and spectra</b>                 | <b>27</b> |
| <b>HRMS spectra of representative compounds</b> | <b>37</b> |
| <b>List of abbreviations</b>                    | <b>40</b> |

## NMR spectra of target compounds

### 6-((4-((3-aminopropyl)amino)-5-(trifluoromethyl)pyrimidin-2-yl)amino)-3,4-dihydronaphthalen-1(2H)-one

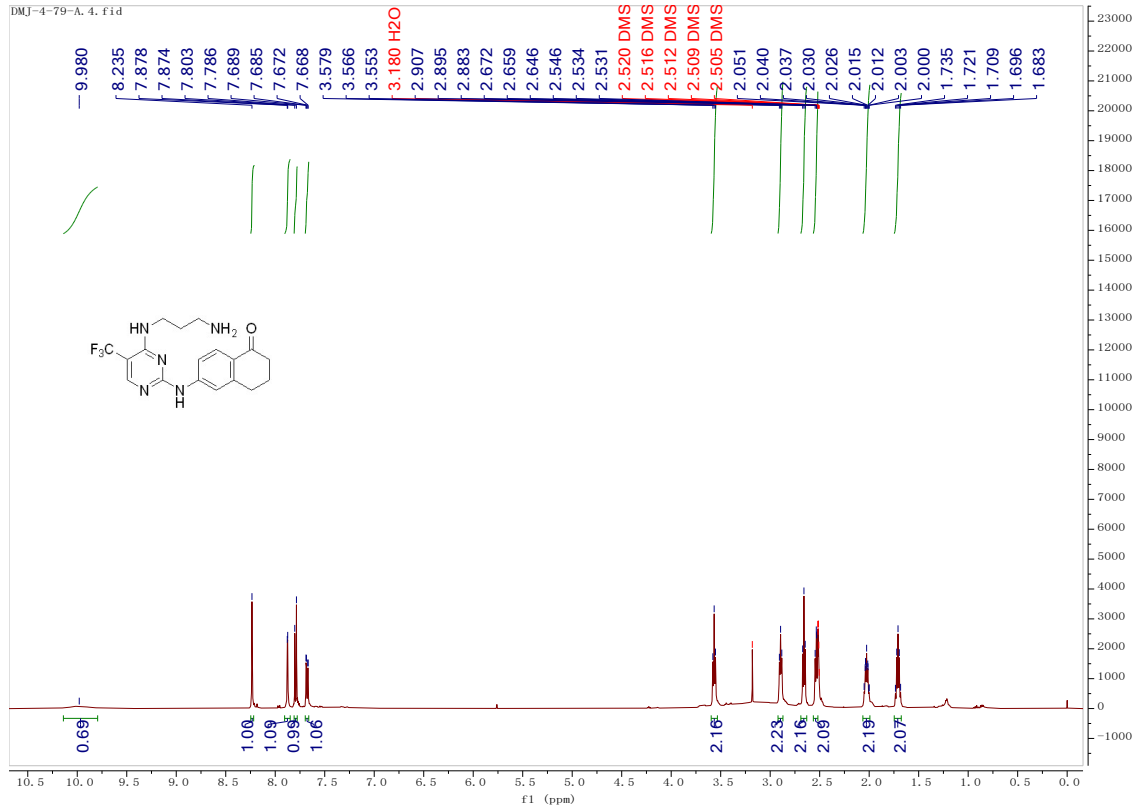

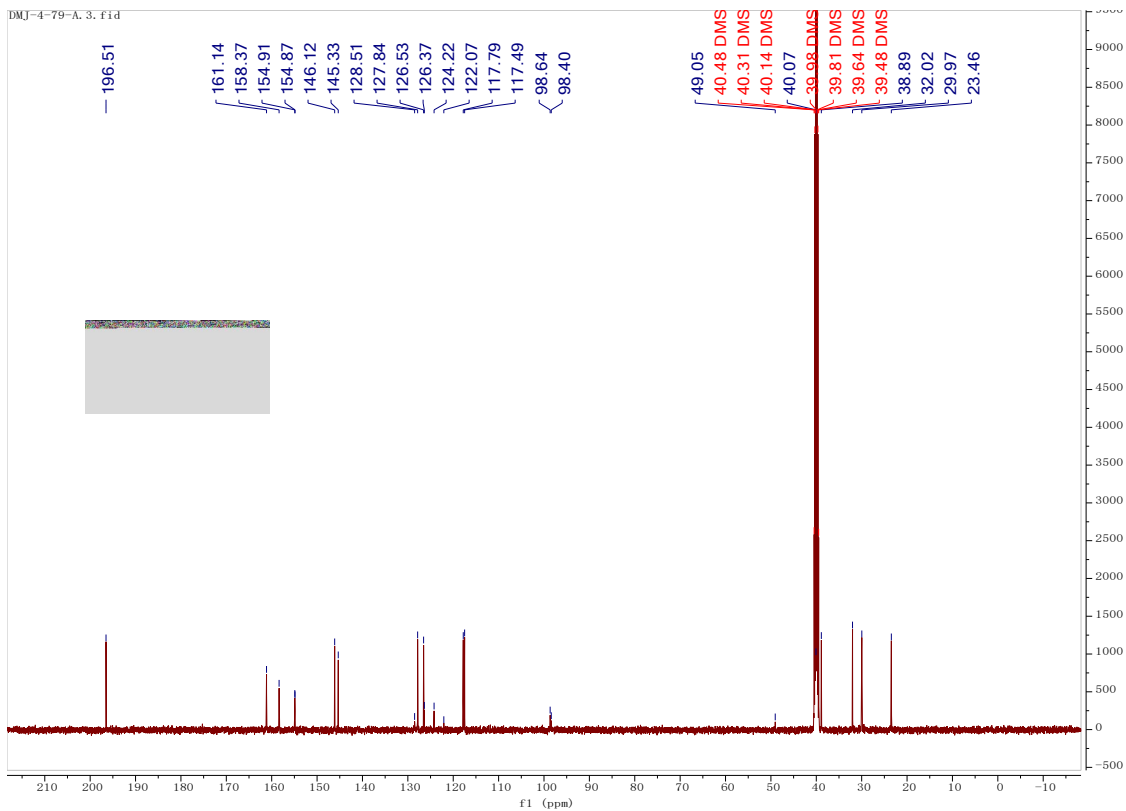

5-((4-((3-aminopropyl)amino)-5-(trifluoromethyl)pyrimidin-2-yl)amino)-2,3-dihydro-1H-inden-1-one

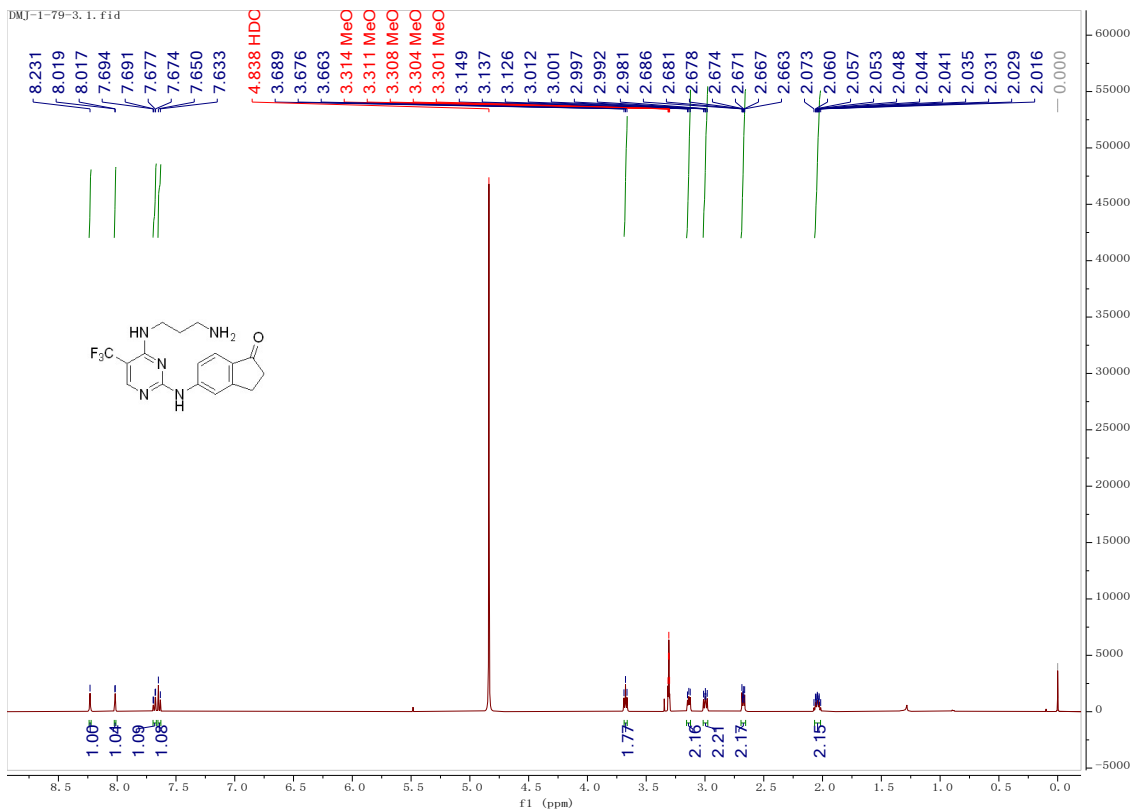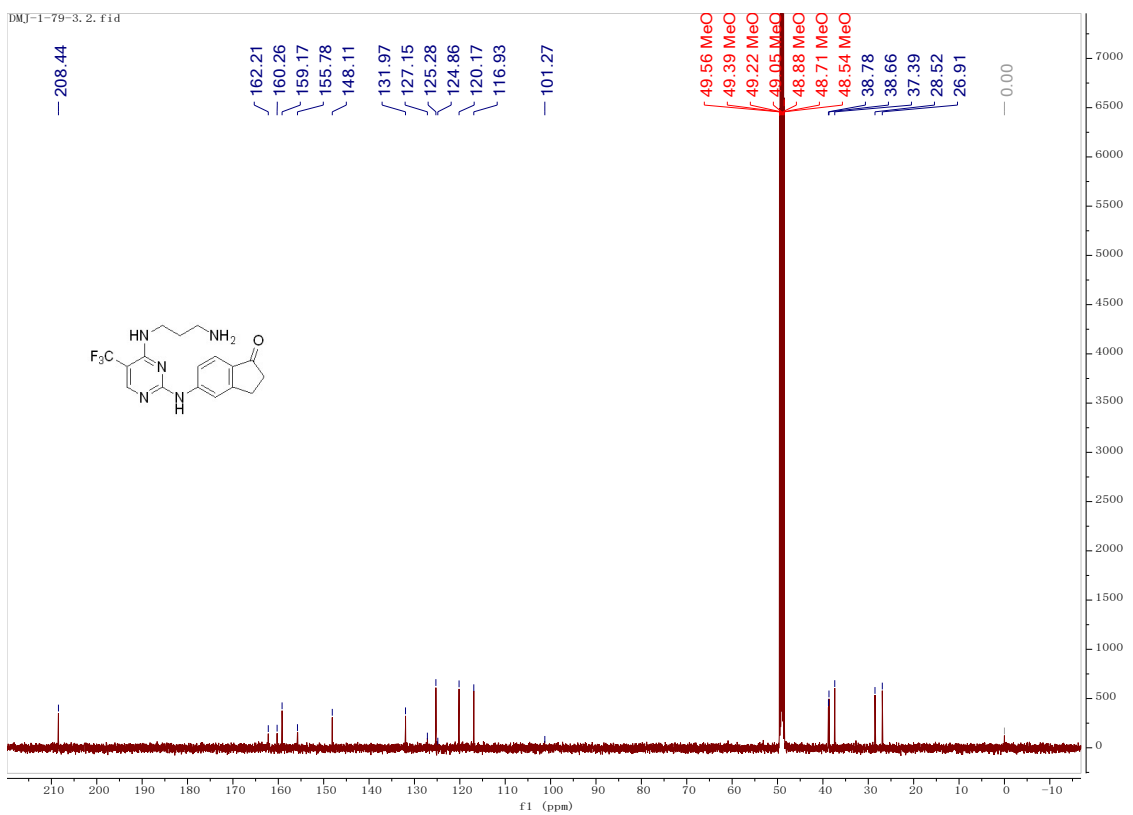

7-((4-((3-aminopropyl)amino)-5-(trifluoromethyl)pyrimidin-2-yl)amino)chroman-4-one

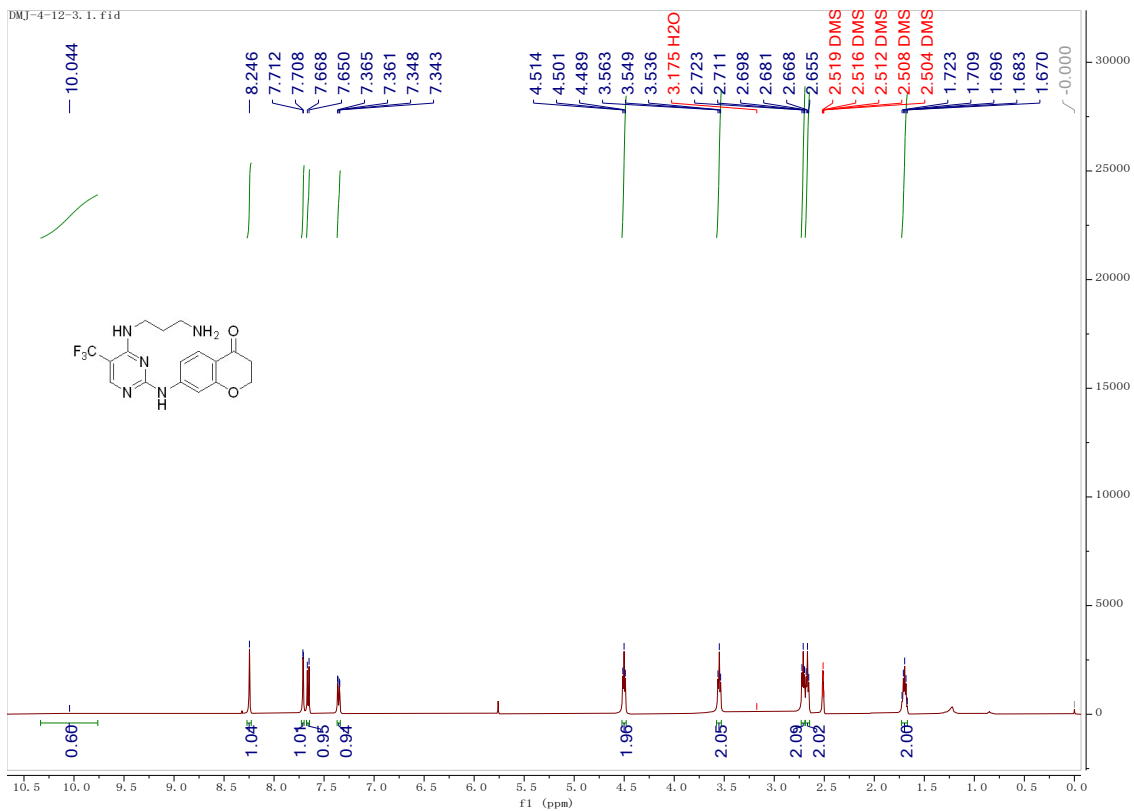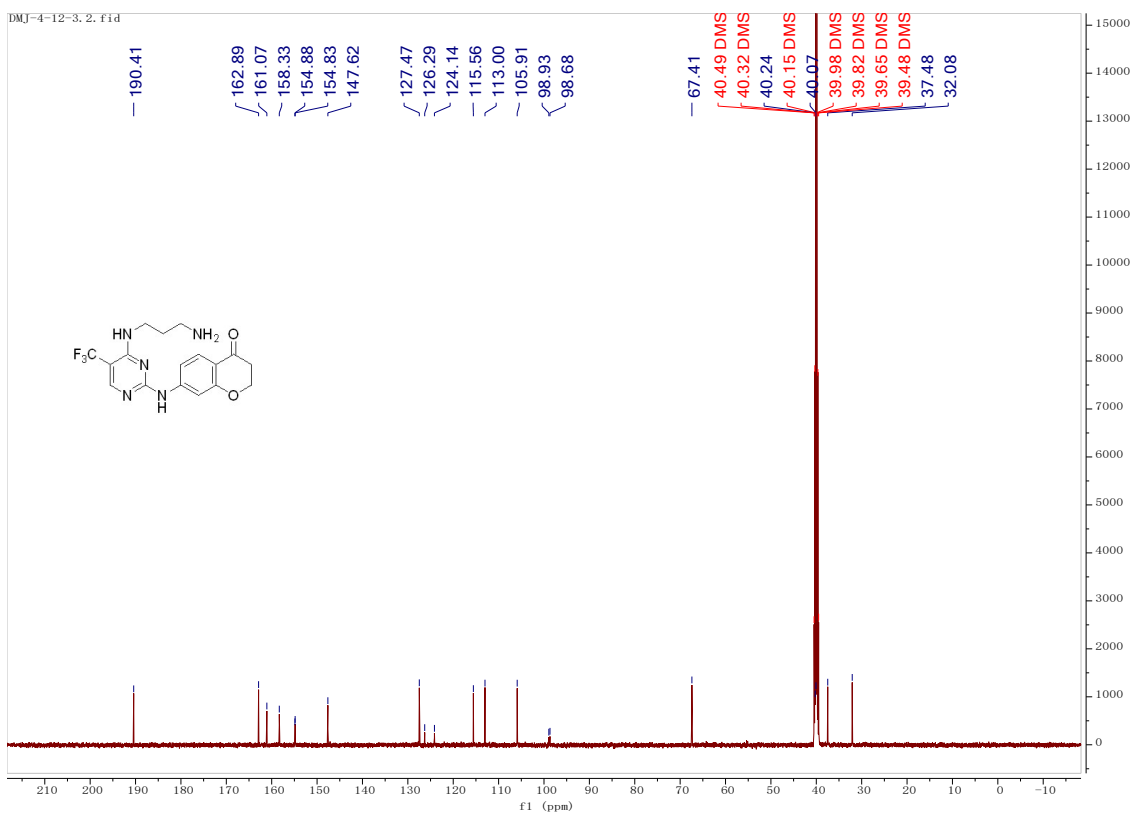

5-((4-((3-aminopropyl)amino)-5-(trifluoromethyl)pyrimidin-2-yl)amino)isobenzofuran-

1(3H)-one

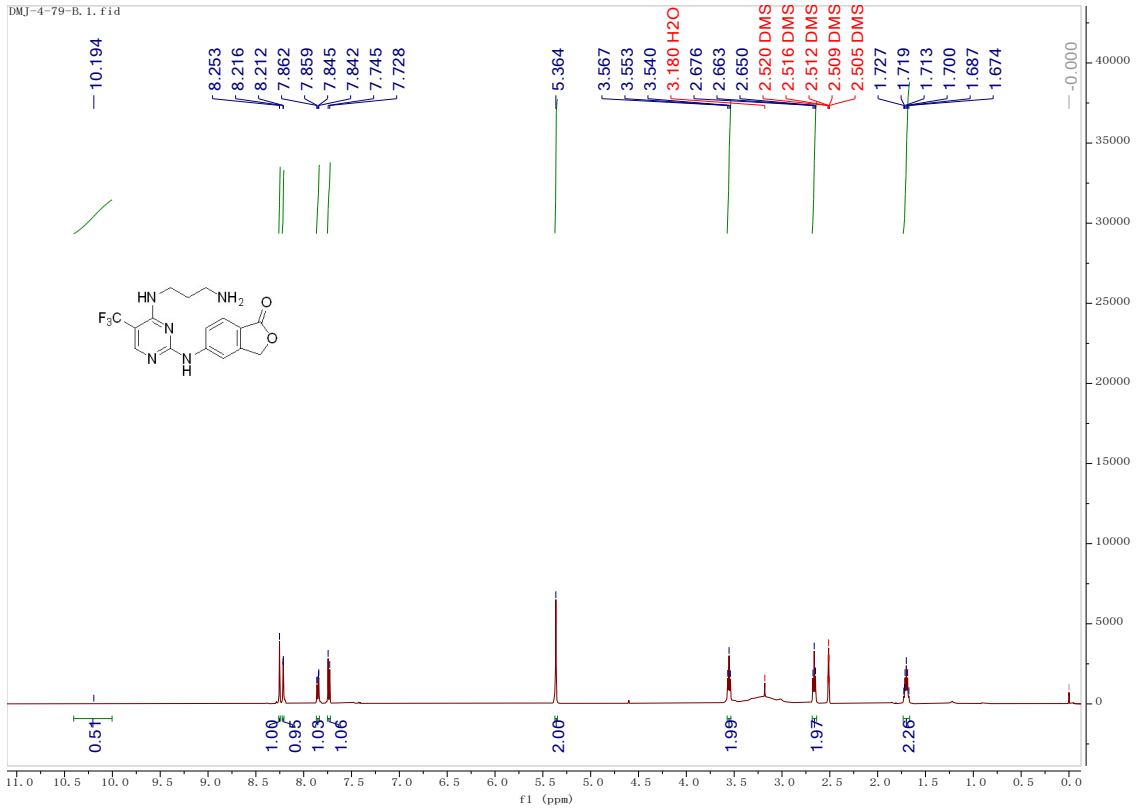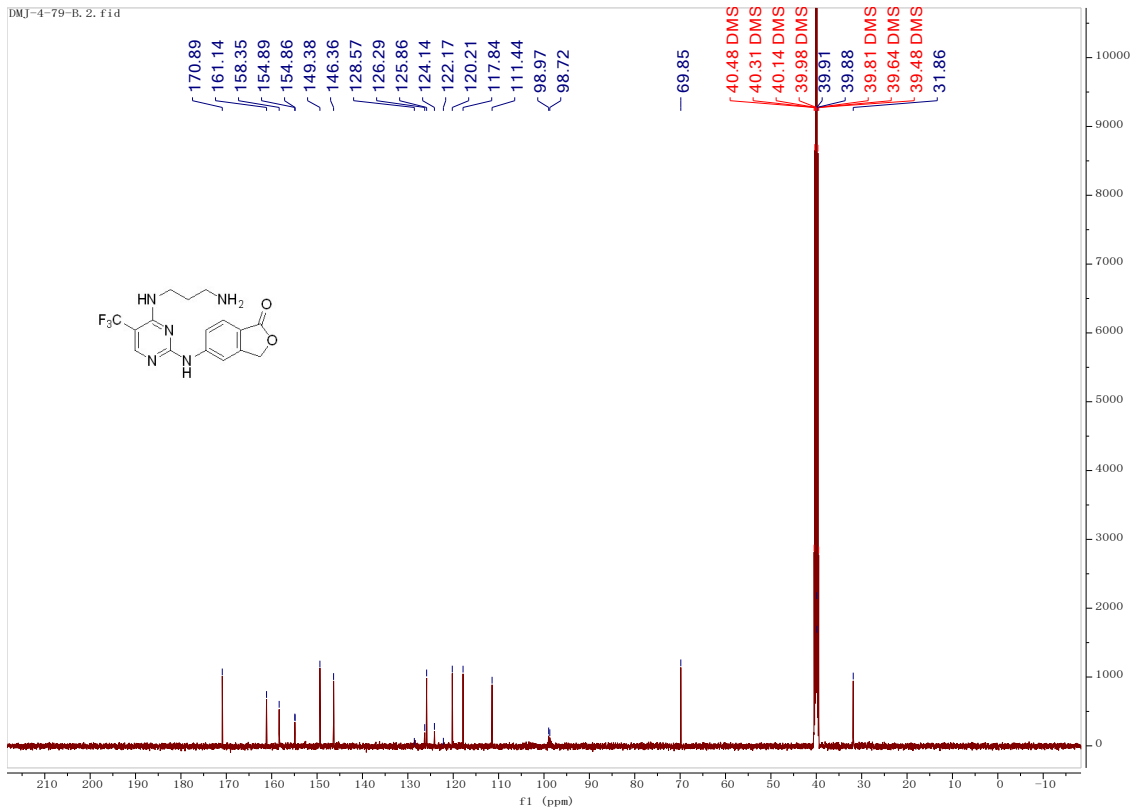

*N*<sup>4</sup>-(3-aminopropyl)-*N*<sup>2</sup>-(2,3-dihydrobenzo[*b*][1,4]dioxin-6-yl)-5-(trifluoromethyl)pyrimidine-2,4-diamine

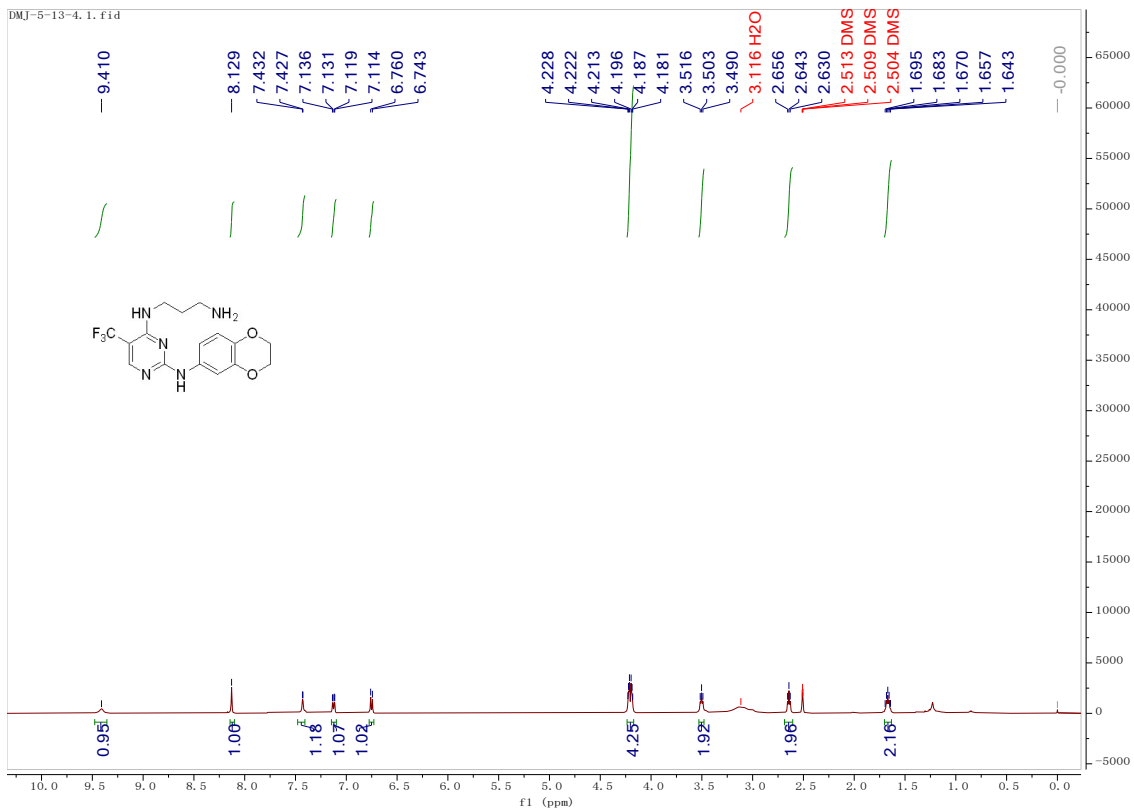

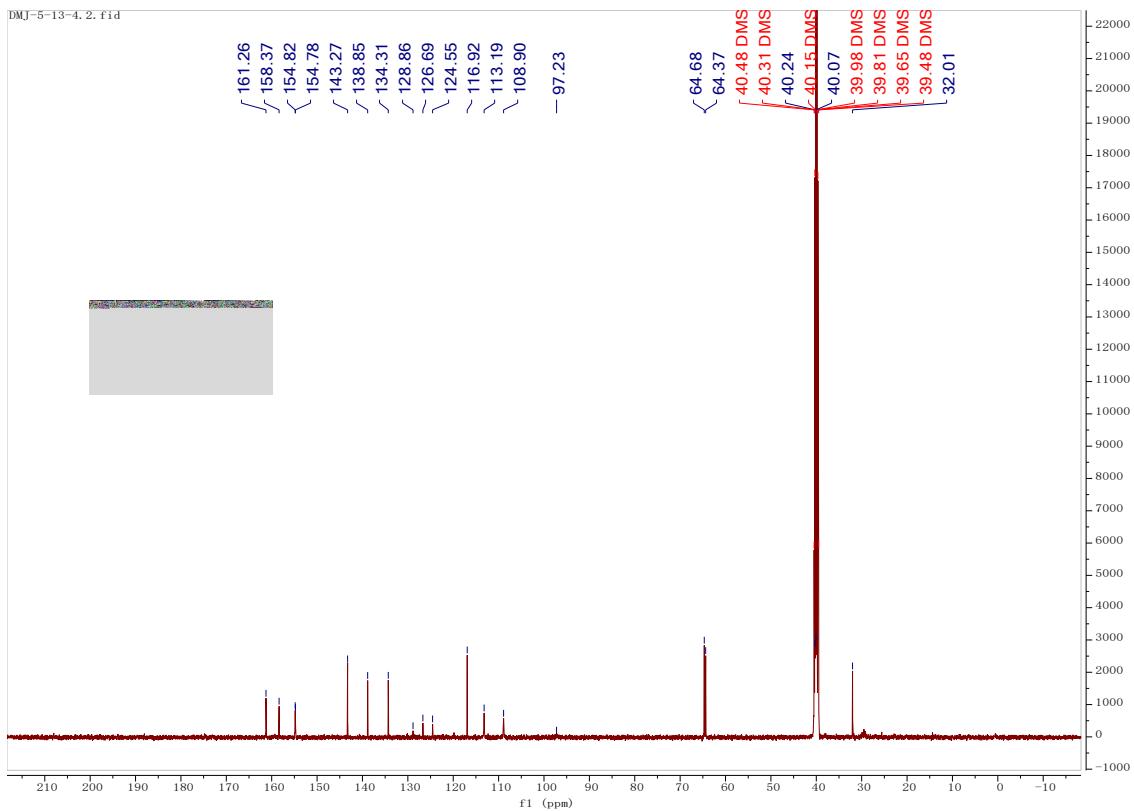

*N*<sup>4</sup>-(3-aminopropyl)-*N*<sup>2</sup>-(benzo[*d*][1,3]dioxol-5-yl)-5-(trifluoromethyl)pyrimidine-2,4-diamine



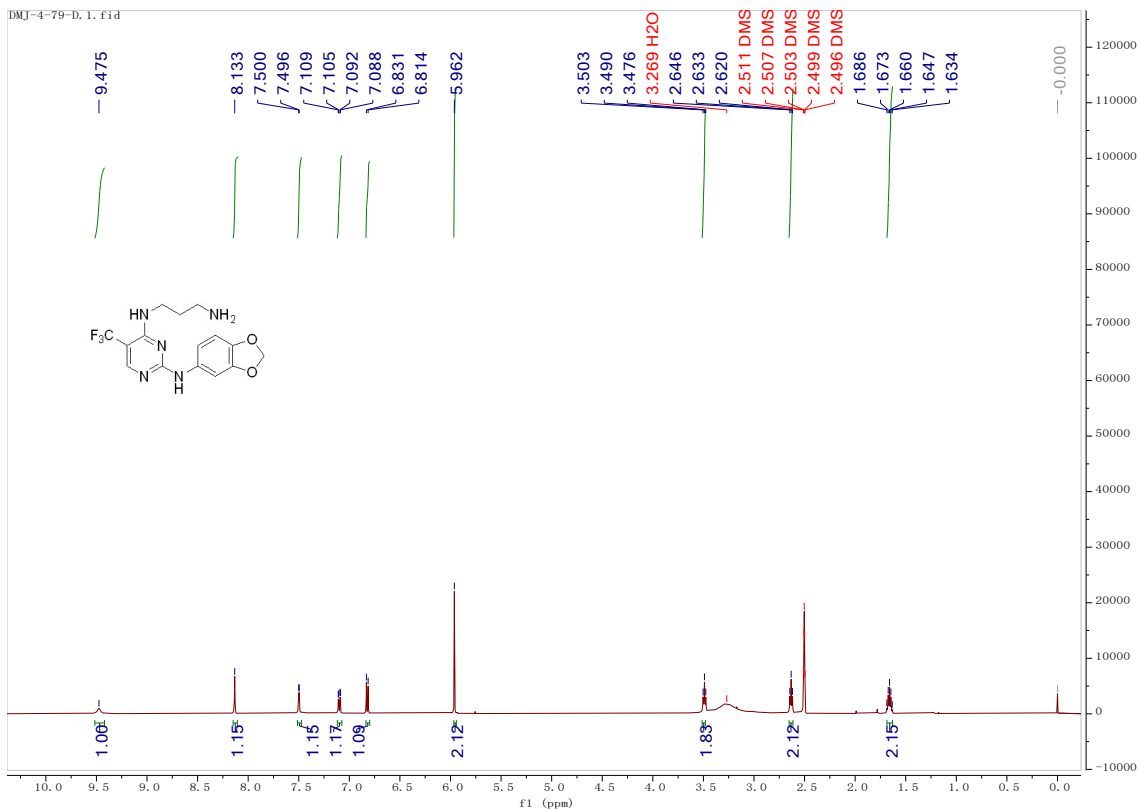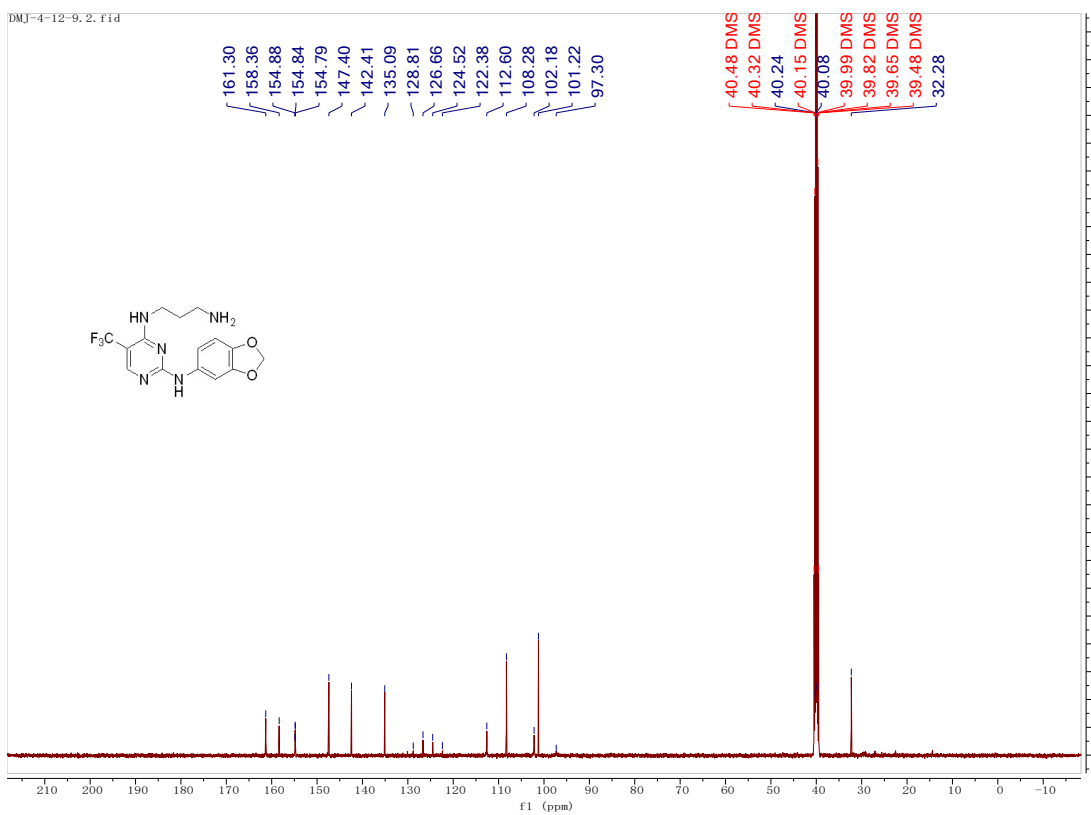

5-((4-((3-aminopropyl)amino)-5-(trifluoromethyl)pyrimidin-2-yl)amino)-2,3-

# dihydrobenzo[*b*]thiophene 1,1-dioxide

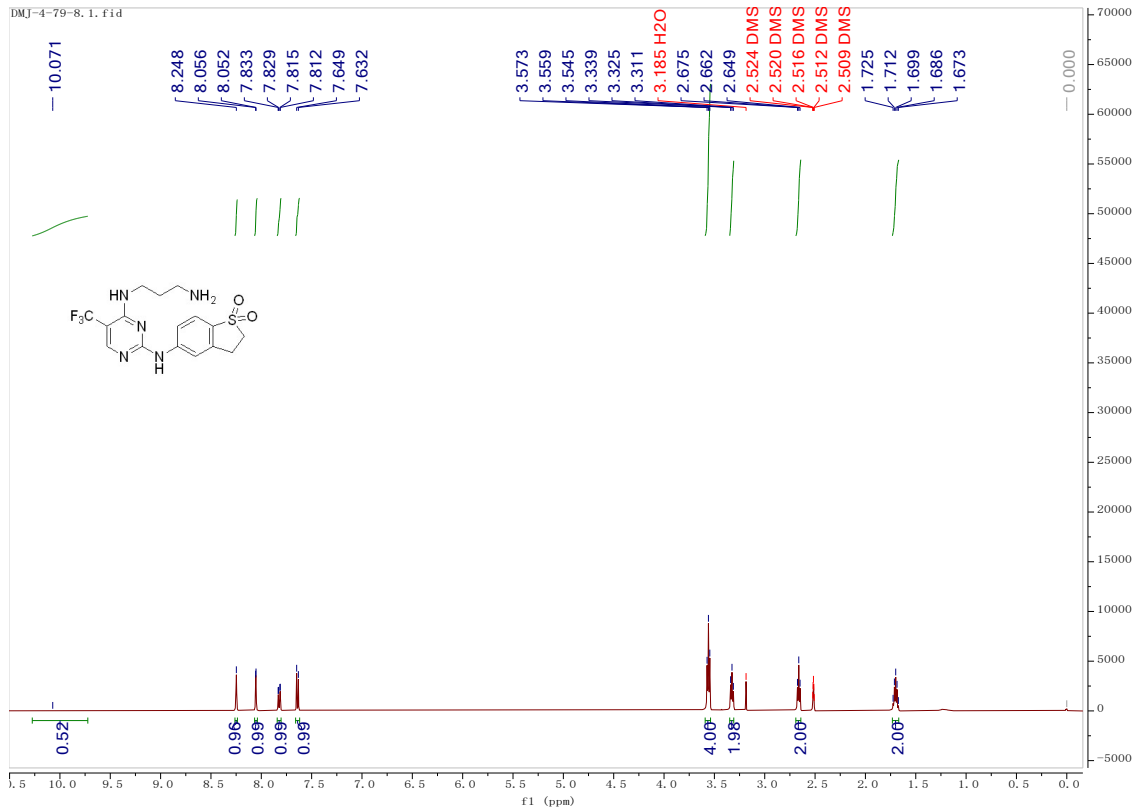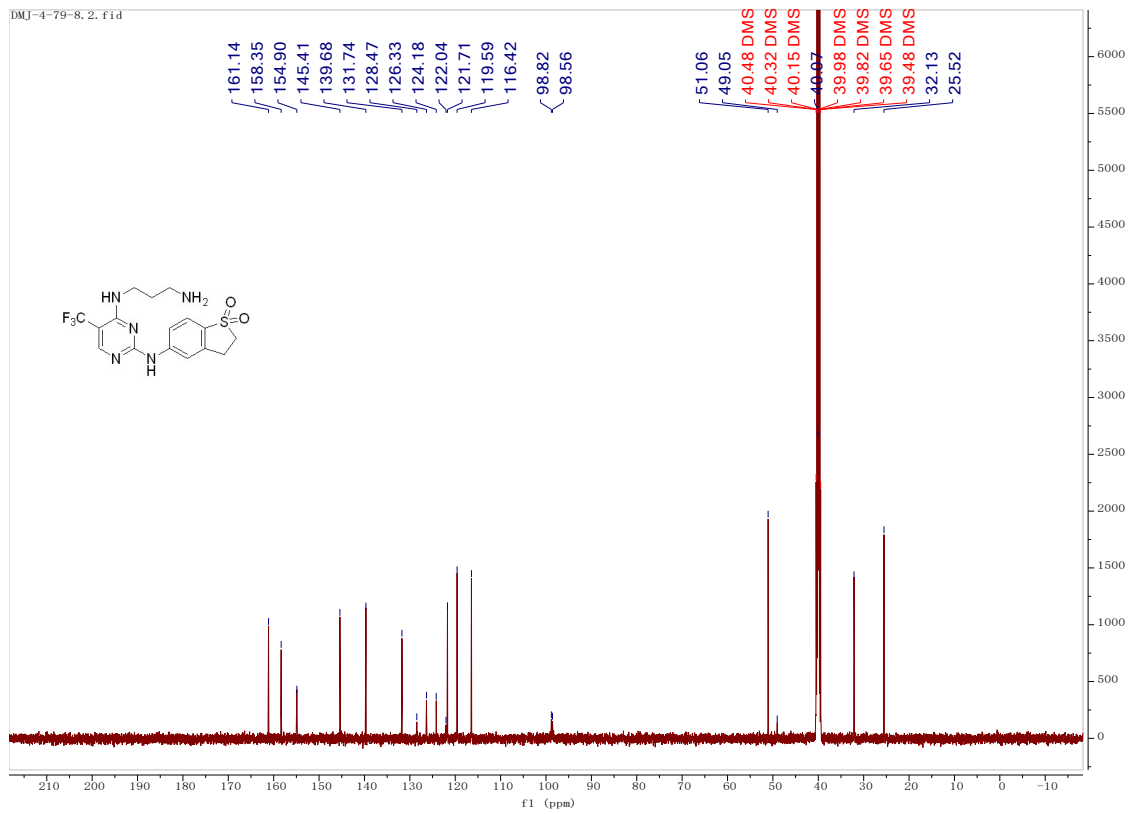

*N*<sup>4</sup>-(3-aminopropyl)-*N*<sup>2</sup>-(1-(methylsulfonyl)-1,2,3,4-tetrahydroquinolin-6-yl)-5-(trifluoromethyl)pyrimidine-2,4-diamine

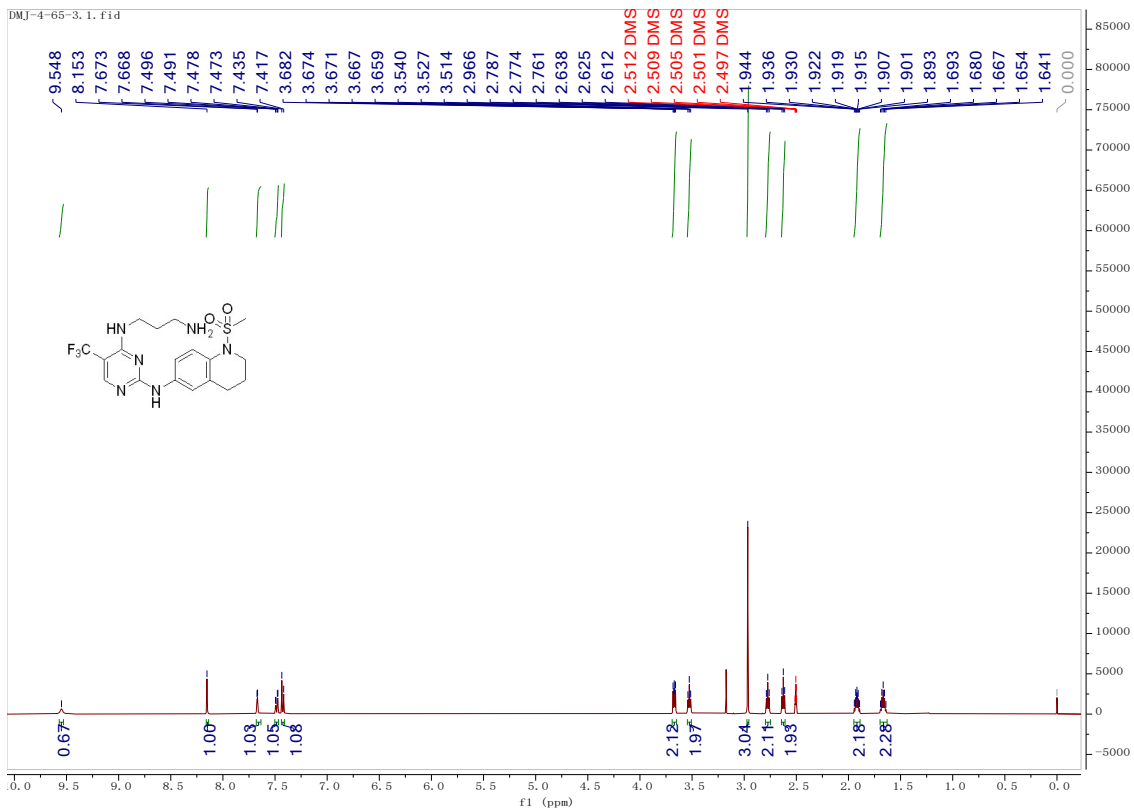

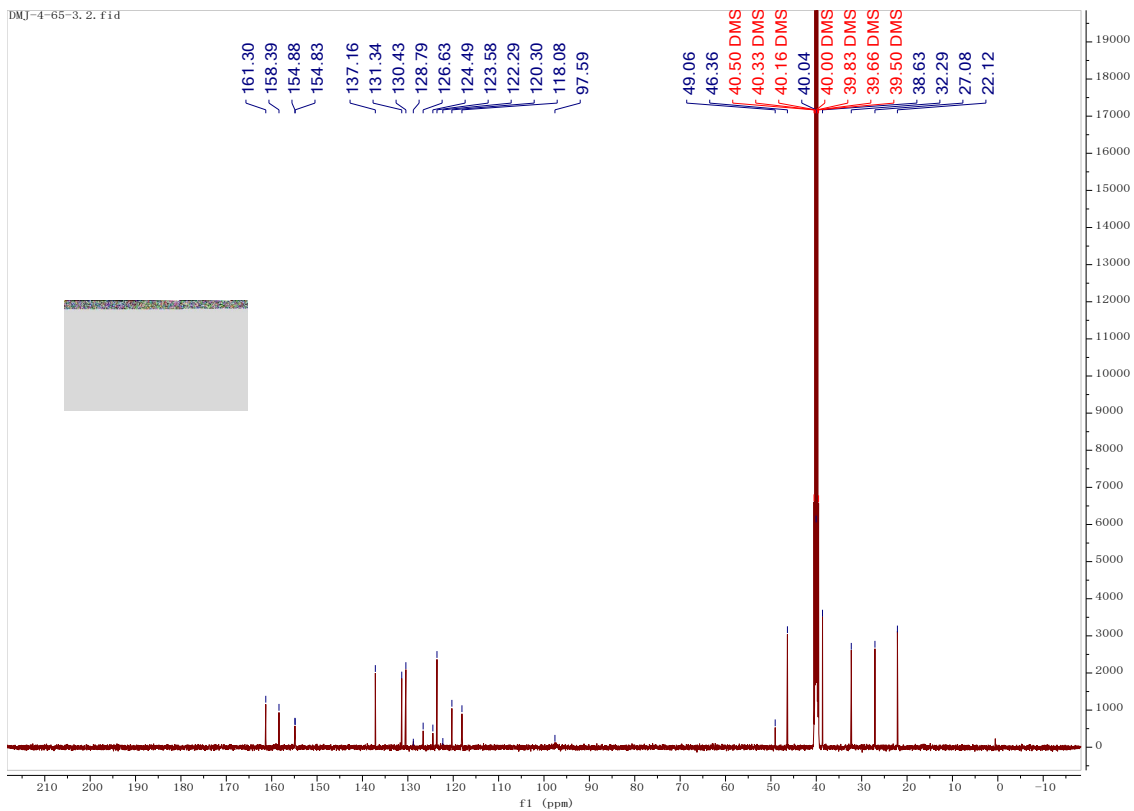

*N*<sup>4</sup>-(3-aminopropyl)-*N*<sup>2</sup>-(2-(methylsulfonyl)-1,2,3,4-tetrahydroisoquinolin-6-yl)-5-(trifluoromethyl)pyrimidine-2,4-diamine

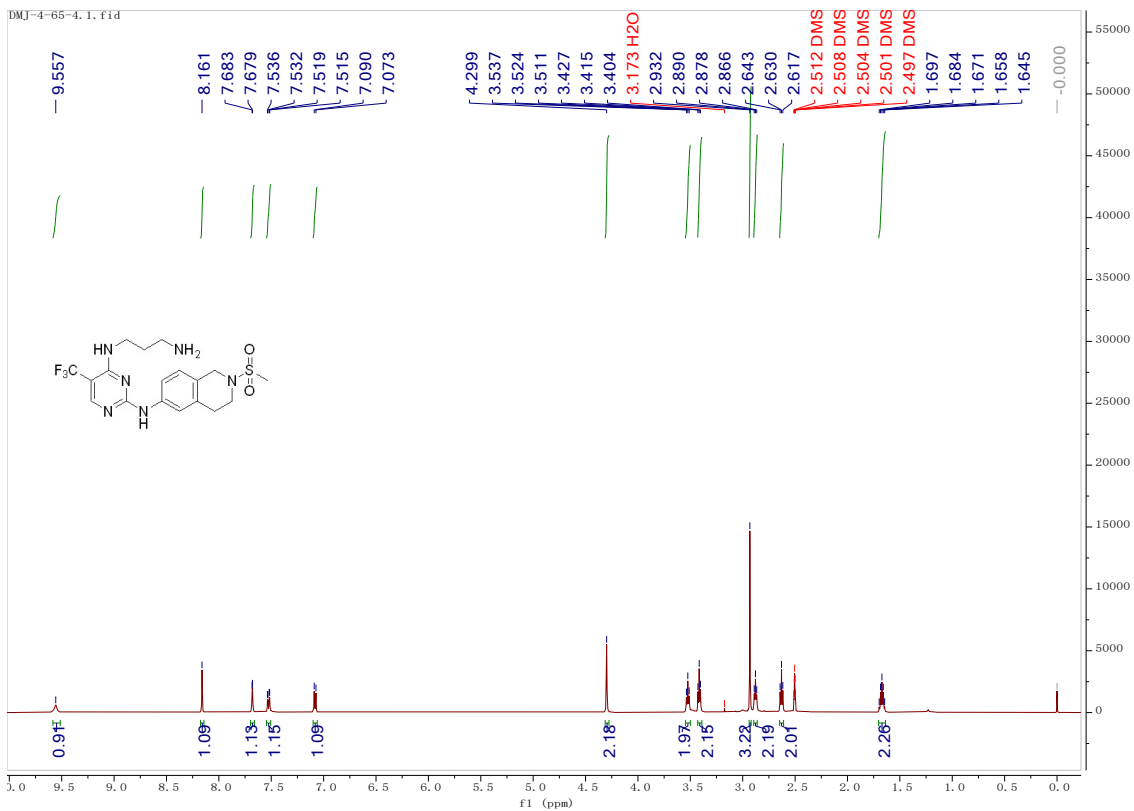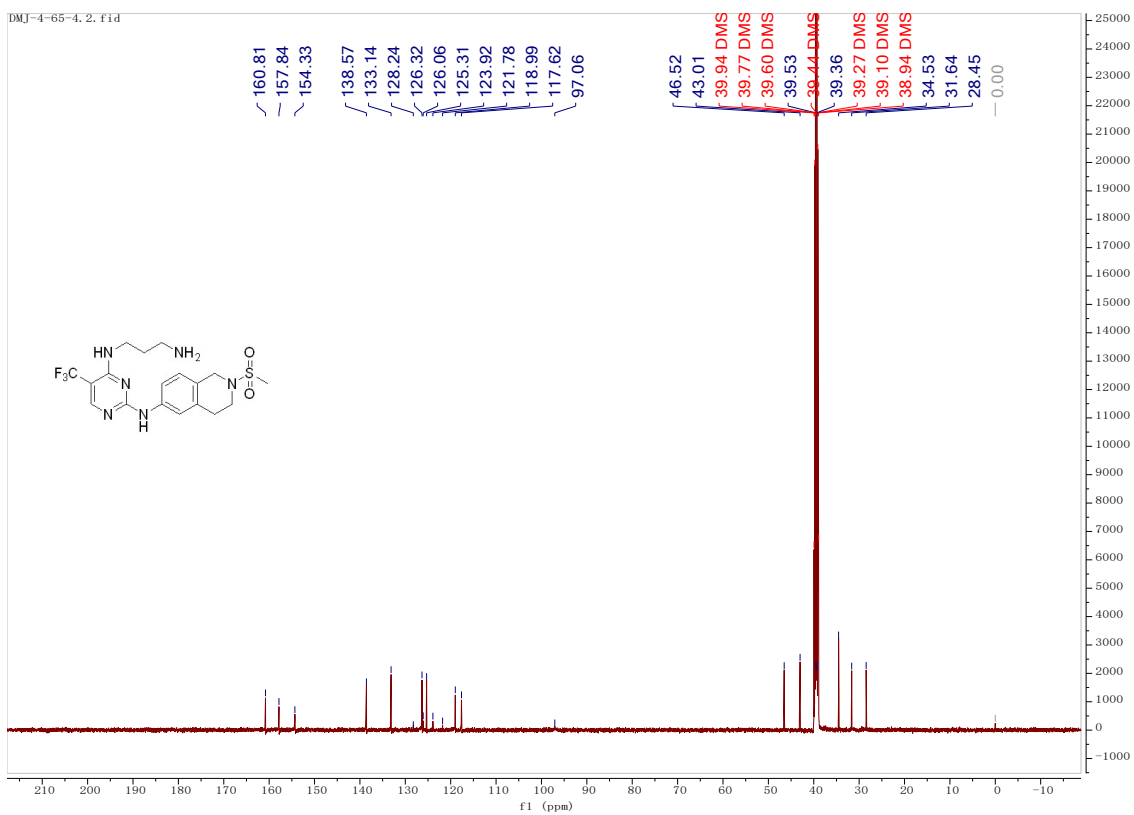

*N*<sup>4</sup>-(3-aminopropyl)-*N*<sup>2</sup>-(1-(methylsulfonyl)indolin-5-yl)-5-(trifluoromethyl)pyrimidine-

# 2,4-diamine

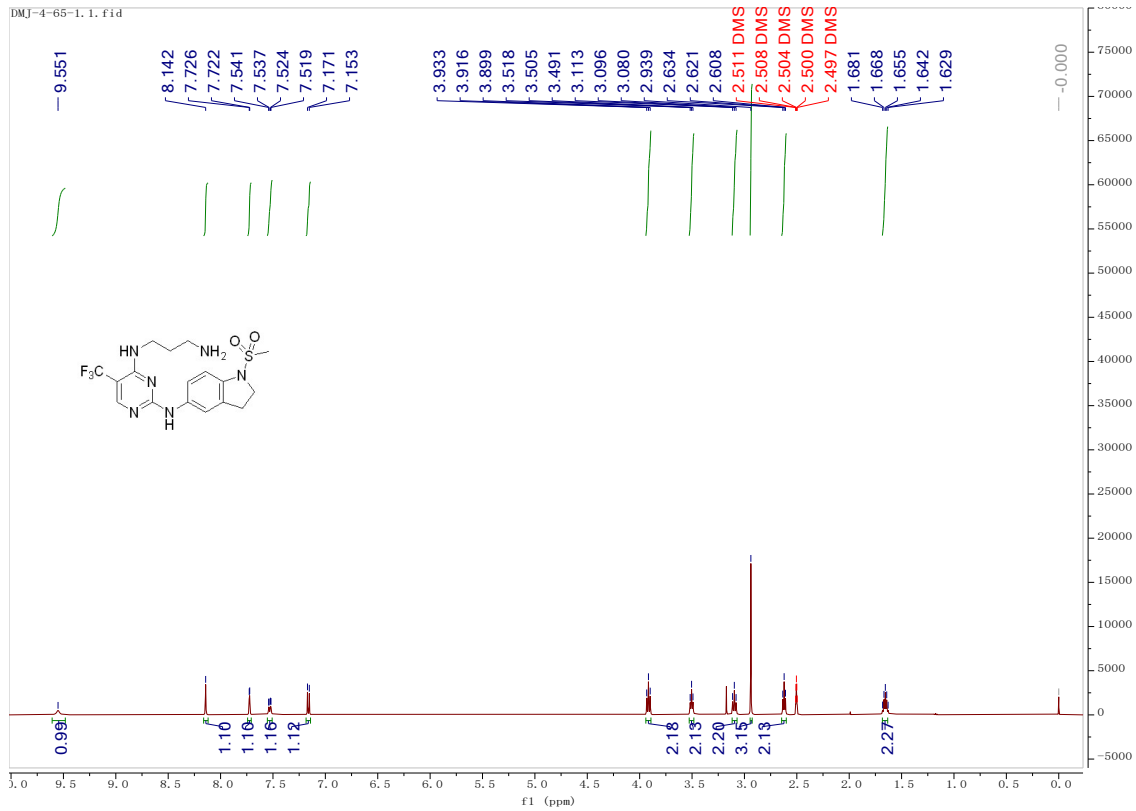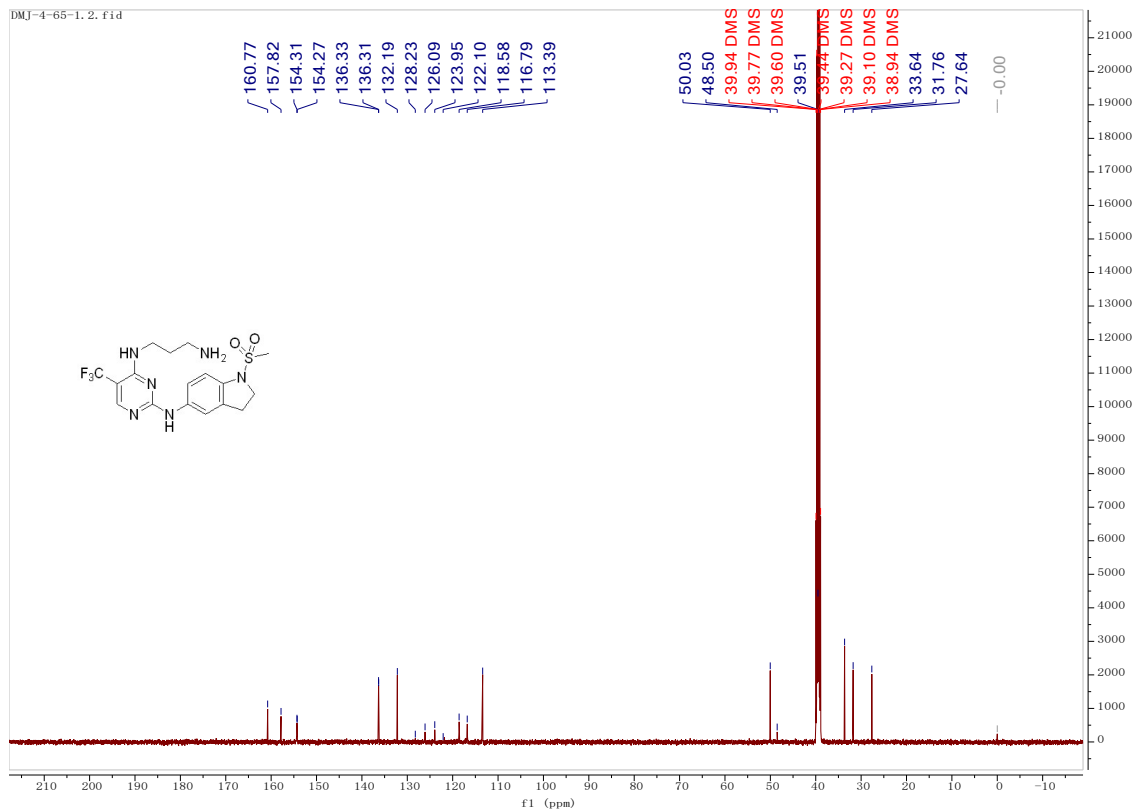

*N*<sup>4</sup>-(3-aminopropyl)-*N*<sup>2</sup>-(2-(methylsulfonyl)isoindolin-5-yl)-5-(trifluoromethyl)pyrimidine-2,4-diamine

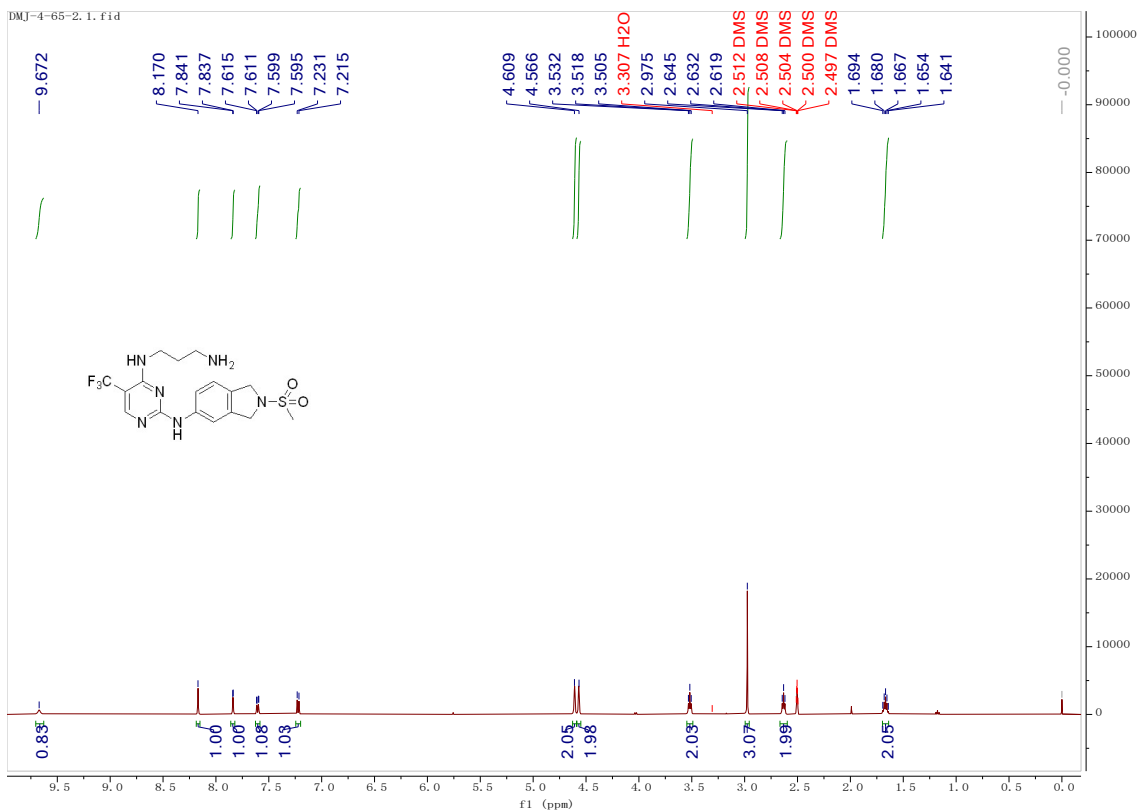

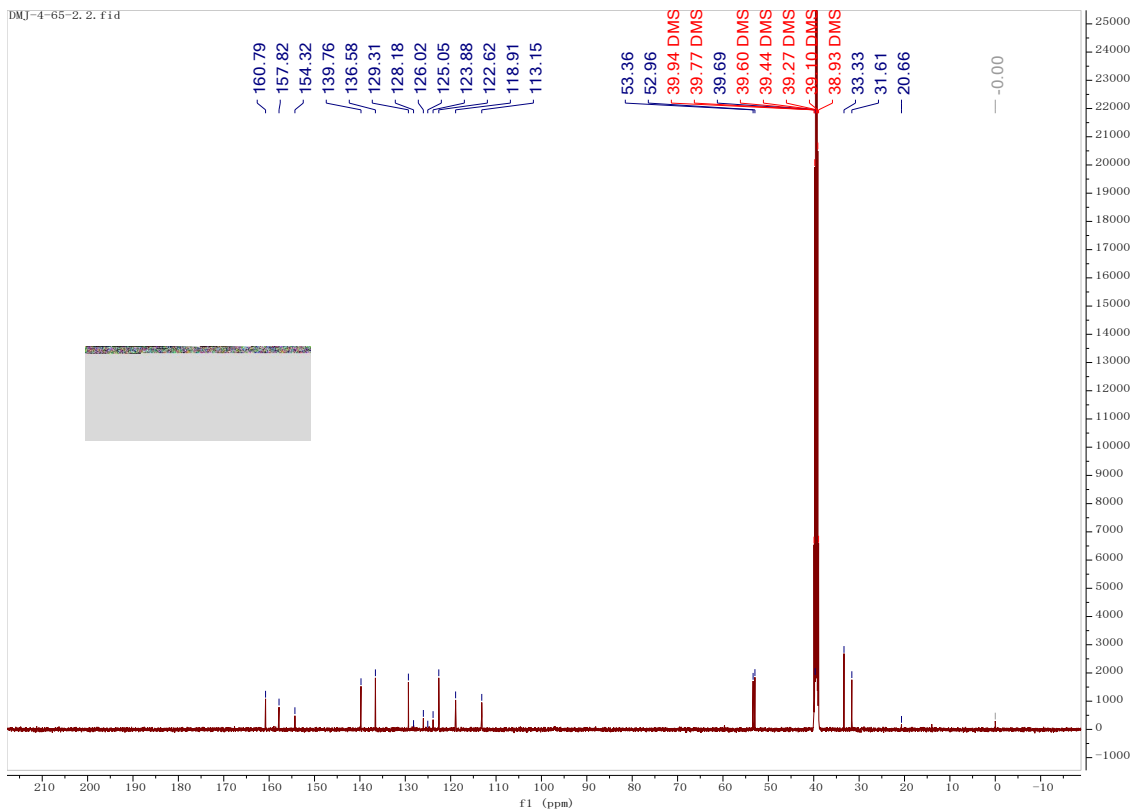

$N^4$ -(3-aminopropyl)- $N^2$ -(4-(methylsulfonyl)-3,4-dihydro-2H-benzo[*b*][1,4]oxazin-7-yl)-5-(trifluoromethyl)pyrimidine-2,4-diamine



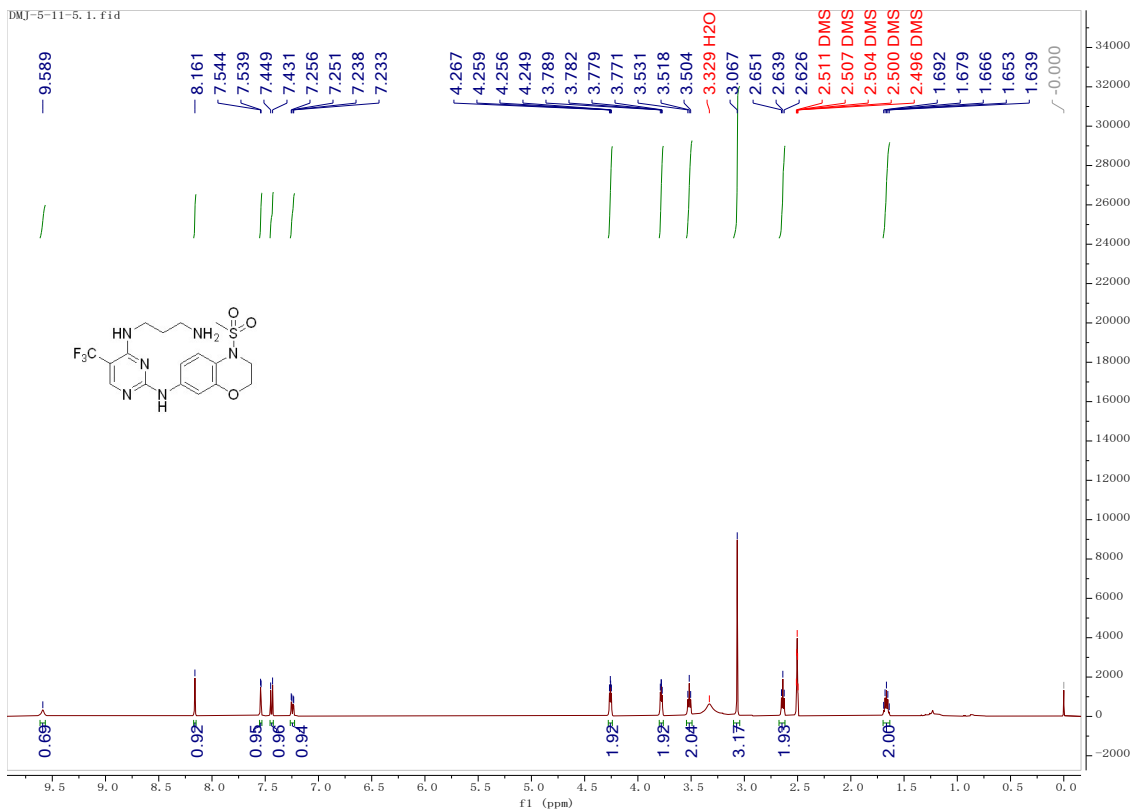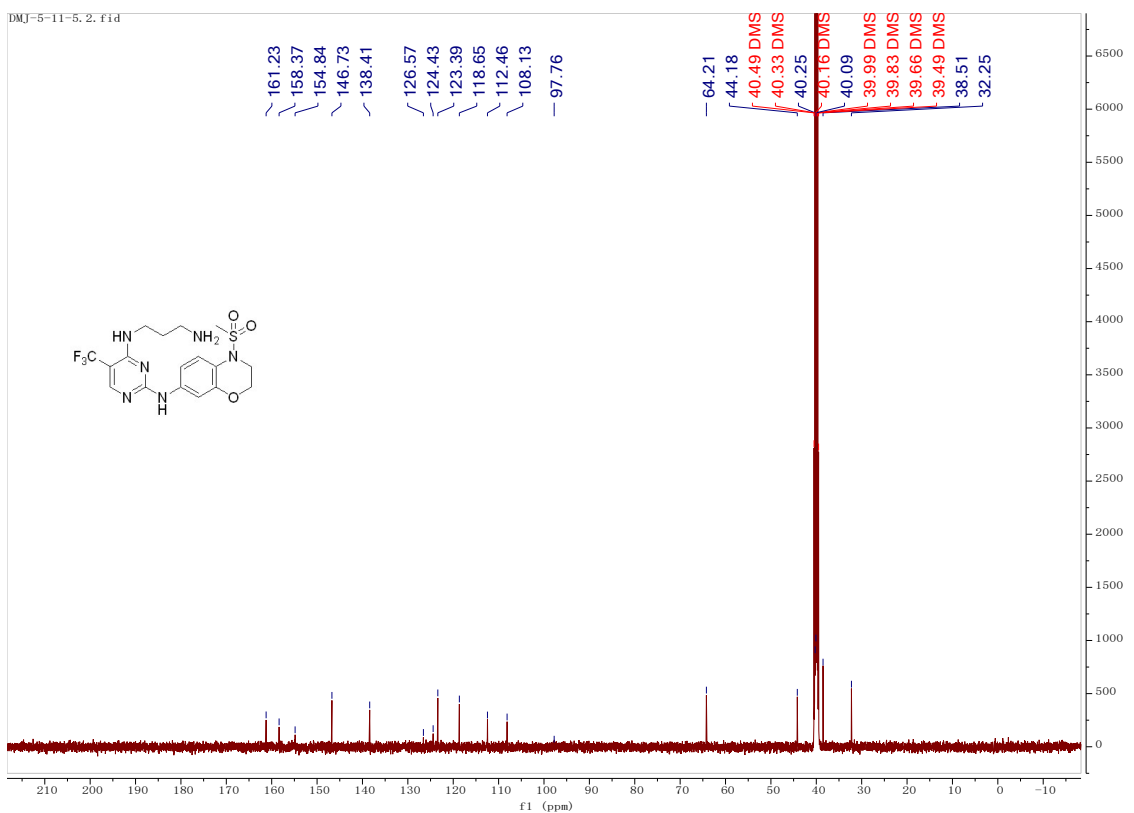

*N*<sup>4</sup>-(3-aminopropyl)-*N*<sup>2</sup>-(1-(ethylsulfonyl)-1,2,3,4-tetrahydroquinolin-6-yl)-5-

(trifluoromethyl)pyrimidine-2,4-diamine

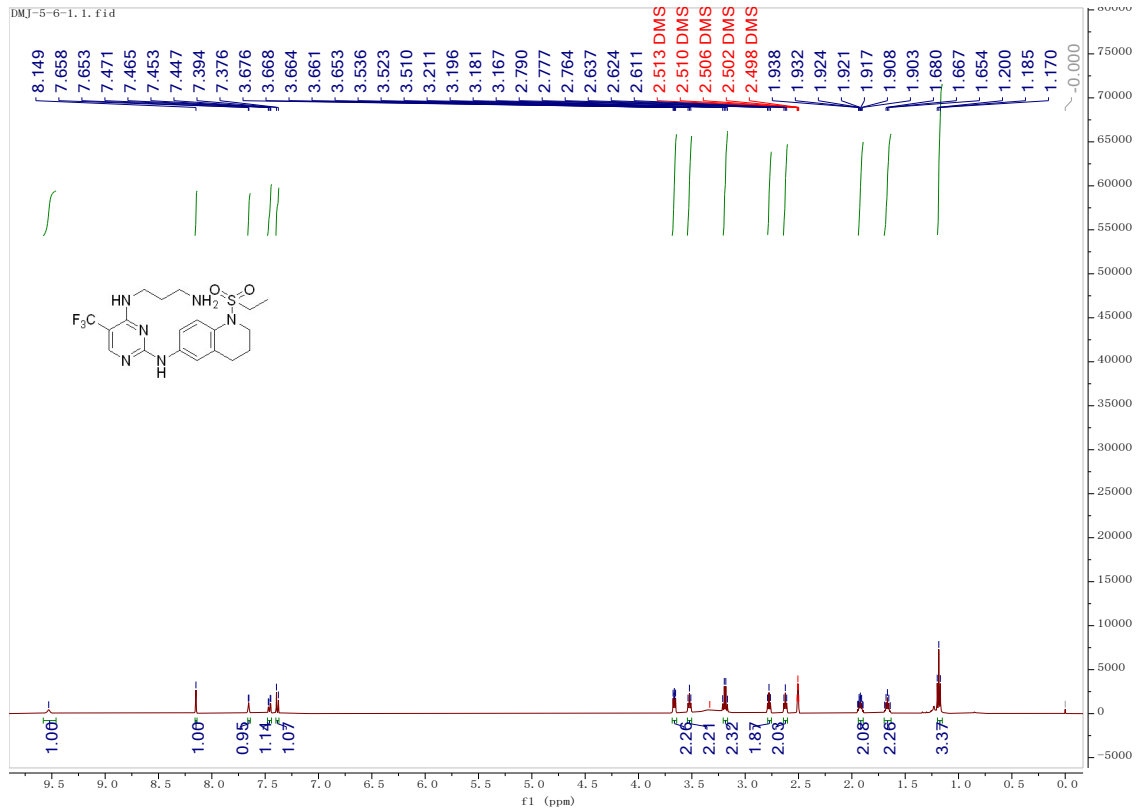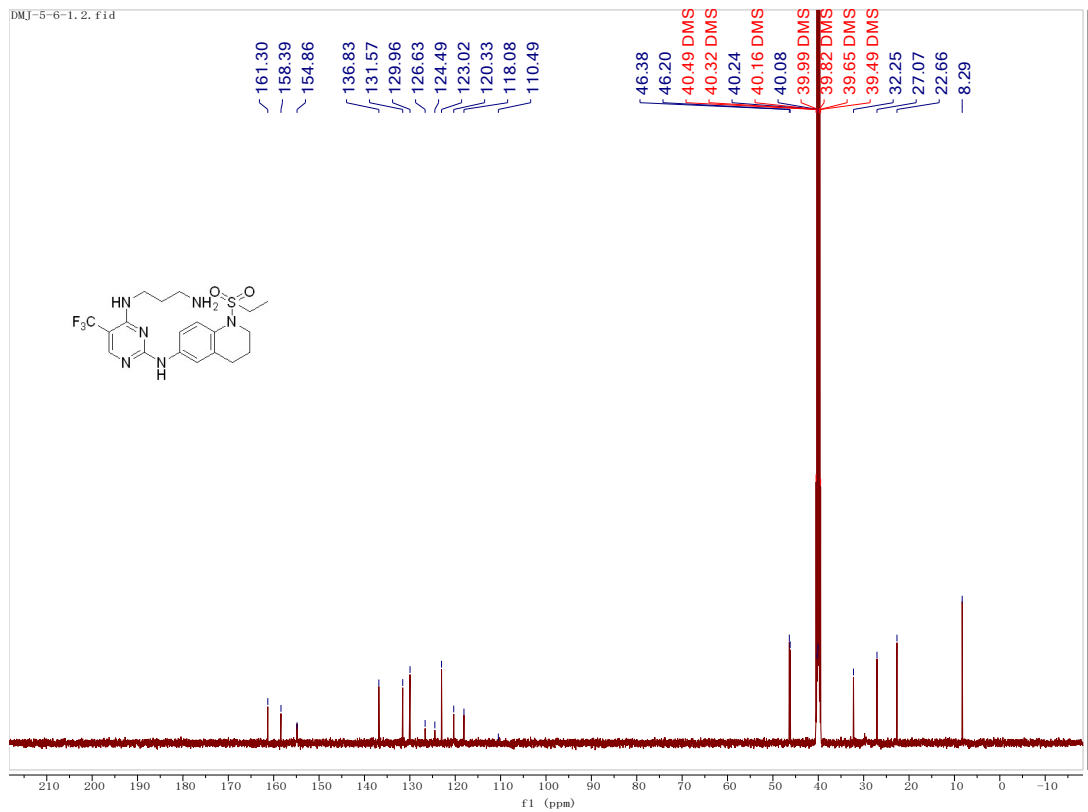

*N*<sup>4</sup>-(3-aminopropyl)-*N*<sup>2</sup>-(2-(ethylsulfonyl)-1,2,3,4-tetrahydroisoquinolin-6-yl)-5-(trifluoromethyl)pyrimidine-2,4-diamine

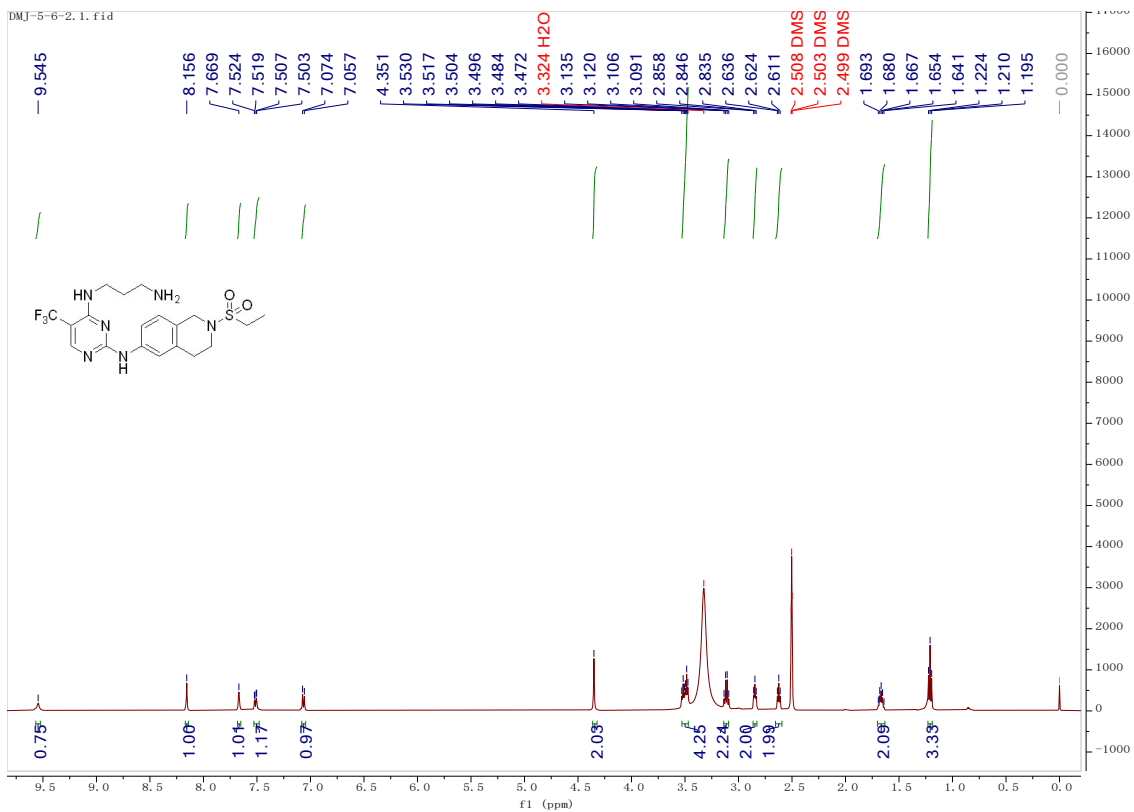

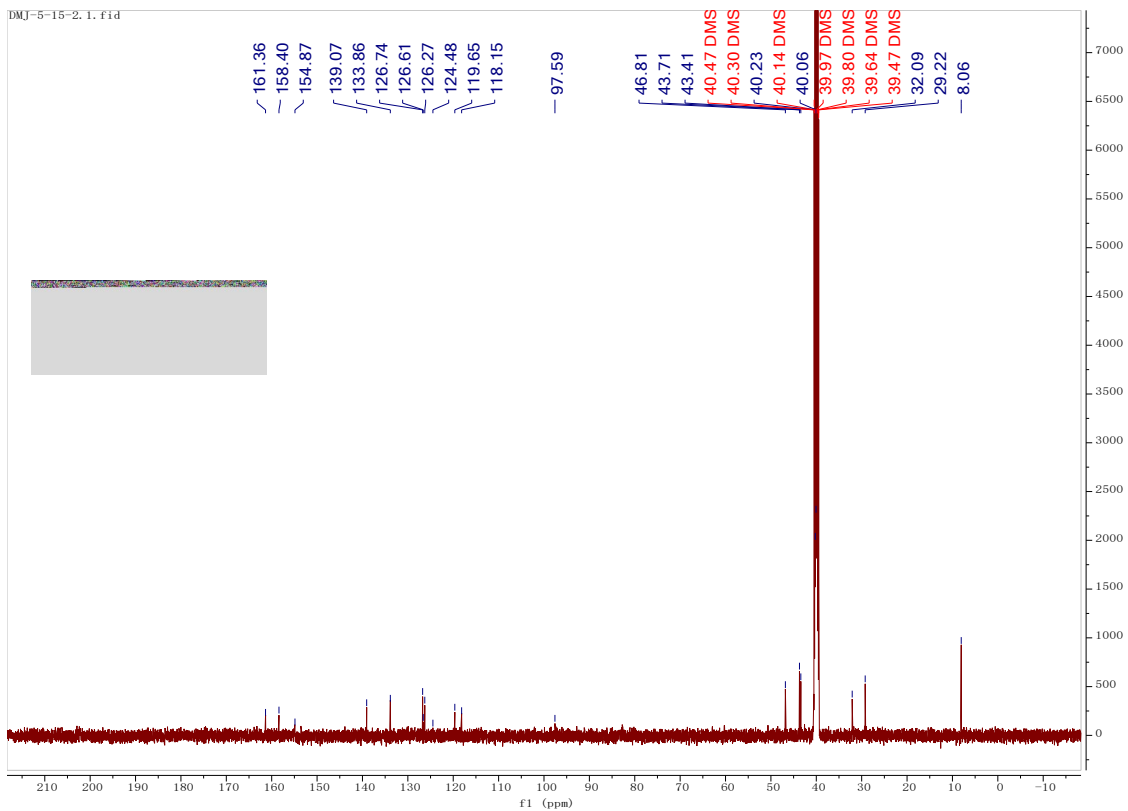

*N*<sup>4</sup>-(3-aminopropyl)-*N*<sup>2</sup>-(1-(cyclopropylsulfonyl)-1,2,3,4-tetrahydroquinolin-6-yl)-5-(trifluoromethyl)pyrimidine-2,4-diamine

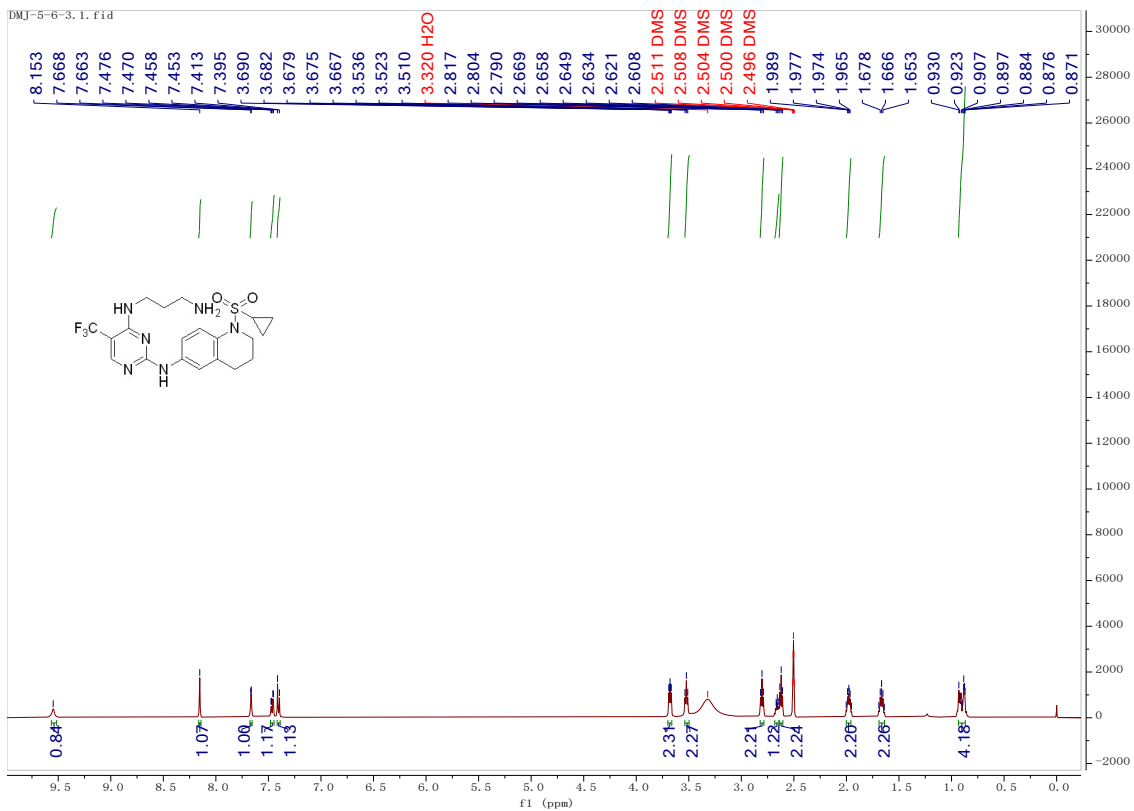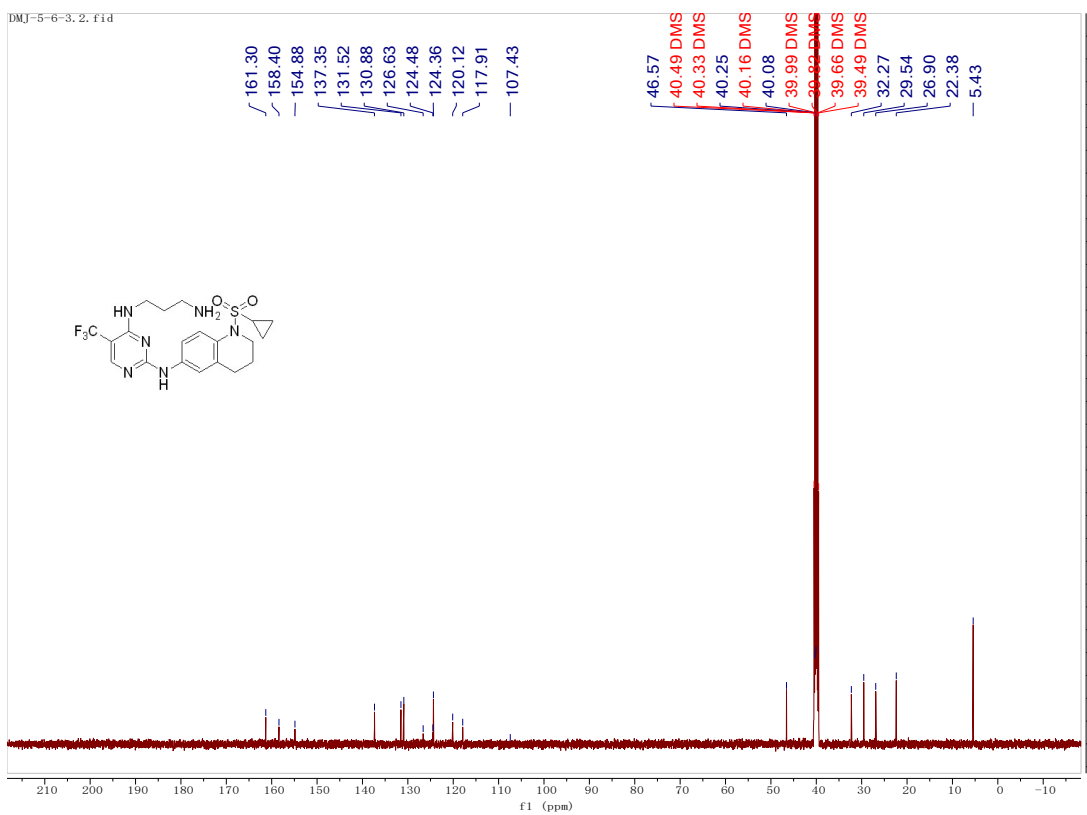

*N*<sup>4</sup>-(3-aminopropyl)-*N*<sup>2</sup>-(2-(cyclopropylsulfonyl)-1,2,3,4-tetrahydroisoquinolin-6-yl)-5-

(trifluoromethyl)pyrimidine-2,4-diamine

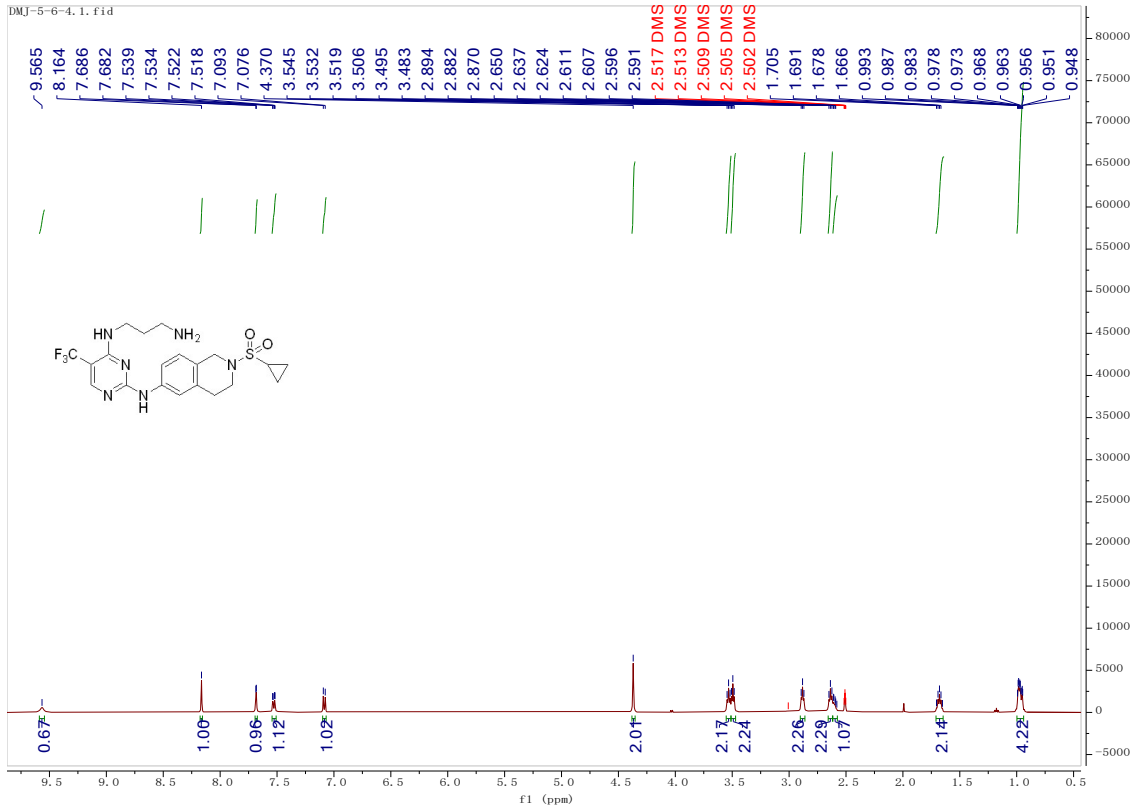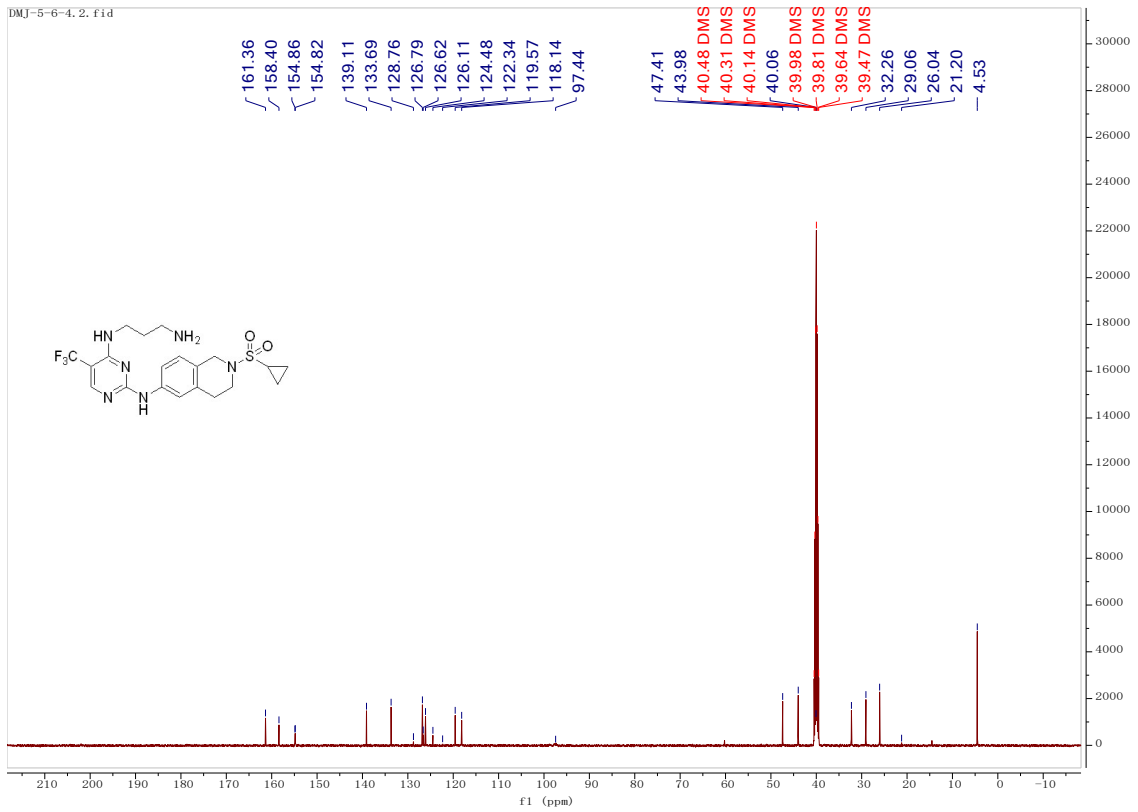

*N*<sup>4</sup>-(3-aminopropyl)-*N*<sup>2</sup>-(2-(cyclohexylsulfonyl)-1,2,3,4-tetrahydroisoquinolin-6-yl)-5-(trifluoromethyl)pyrimidine-2,4-diamine

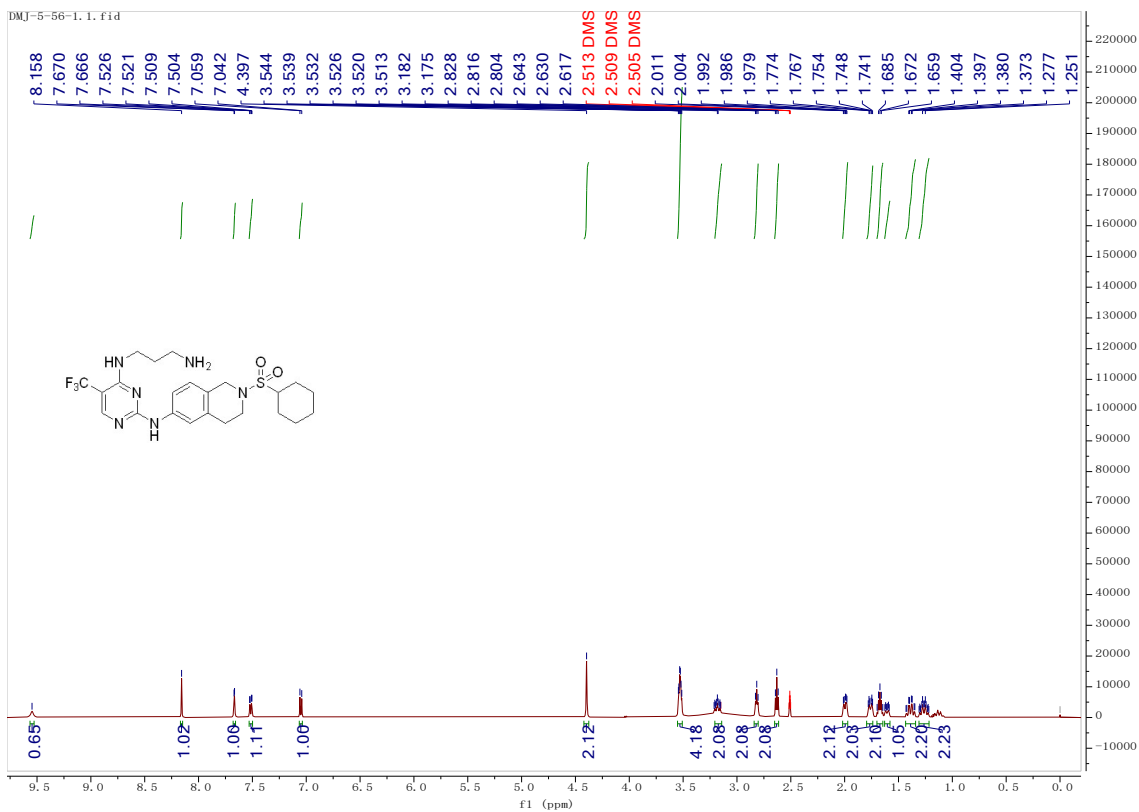

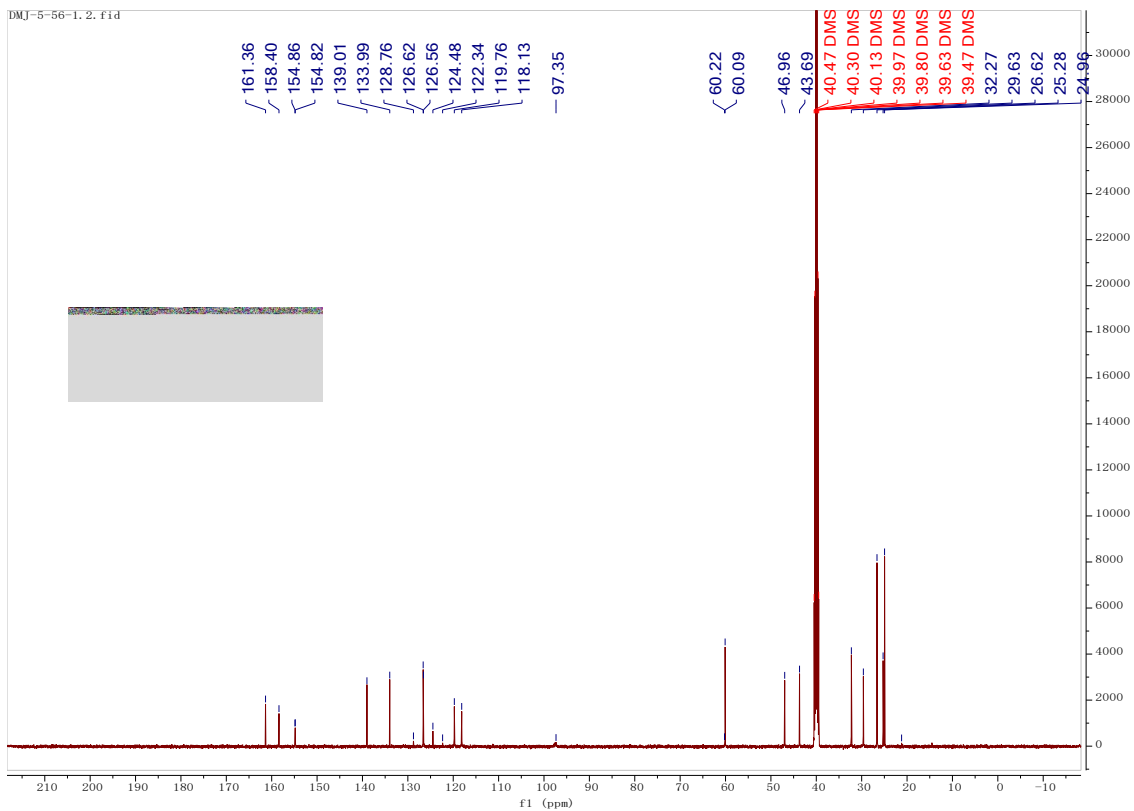

$N^4$ -(3-aminopropyl)- $N^2$ -(1-(phenylsulfonyl)-1,2,3,4-tetrahydroquinolin-6-yl)-5-(trifluoromethyl)pyrimidine-2,4-diamine



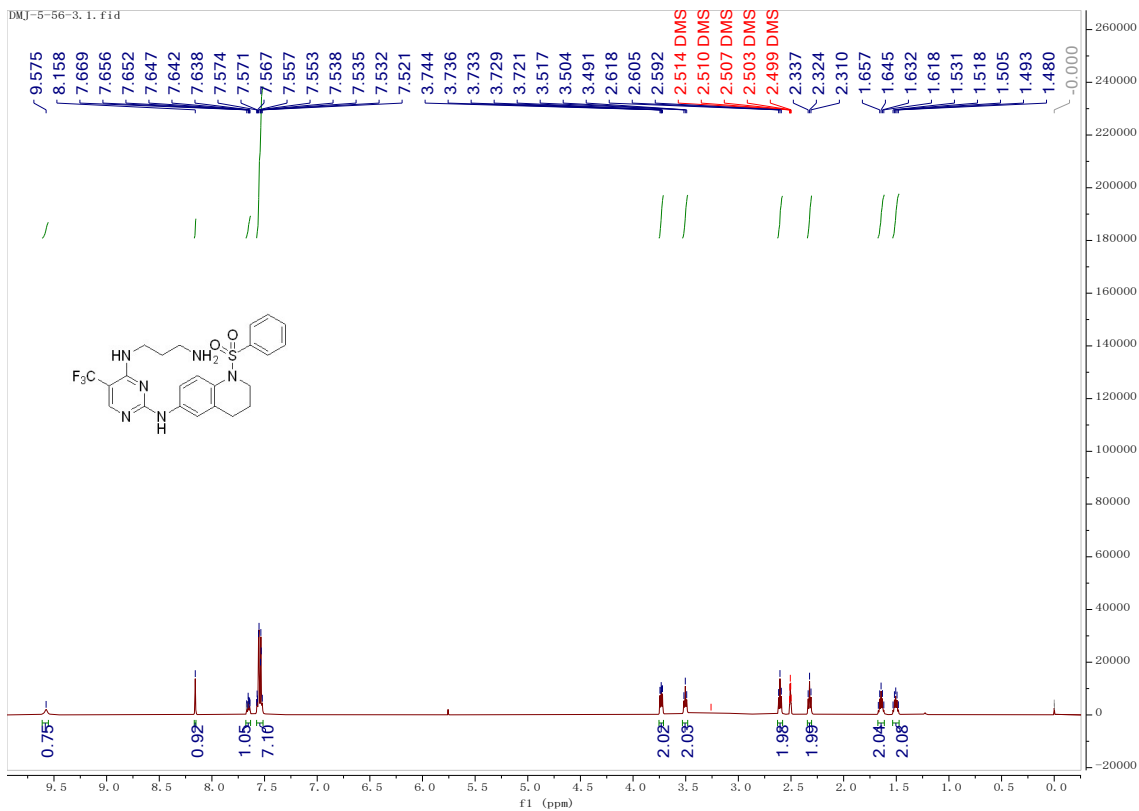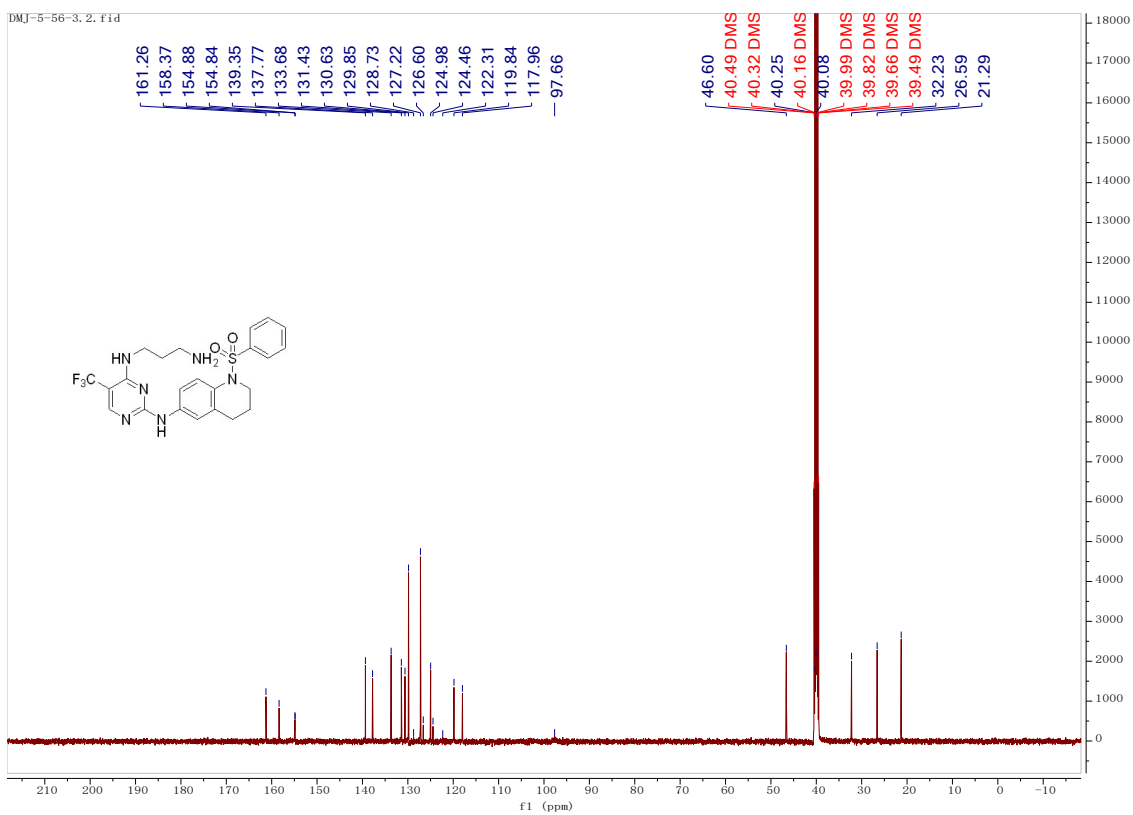

*N*<sup>4</sup>-(3-aminopropyl)-*N*<sup>2</sup>-(2-(phenylsulfonyl)-1,2,3,4-tetrahydroisoquinolin-6-yl)-5-

(trifluoromethyl)pyrimidine-2,4-diamine

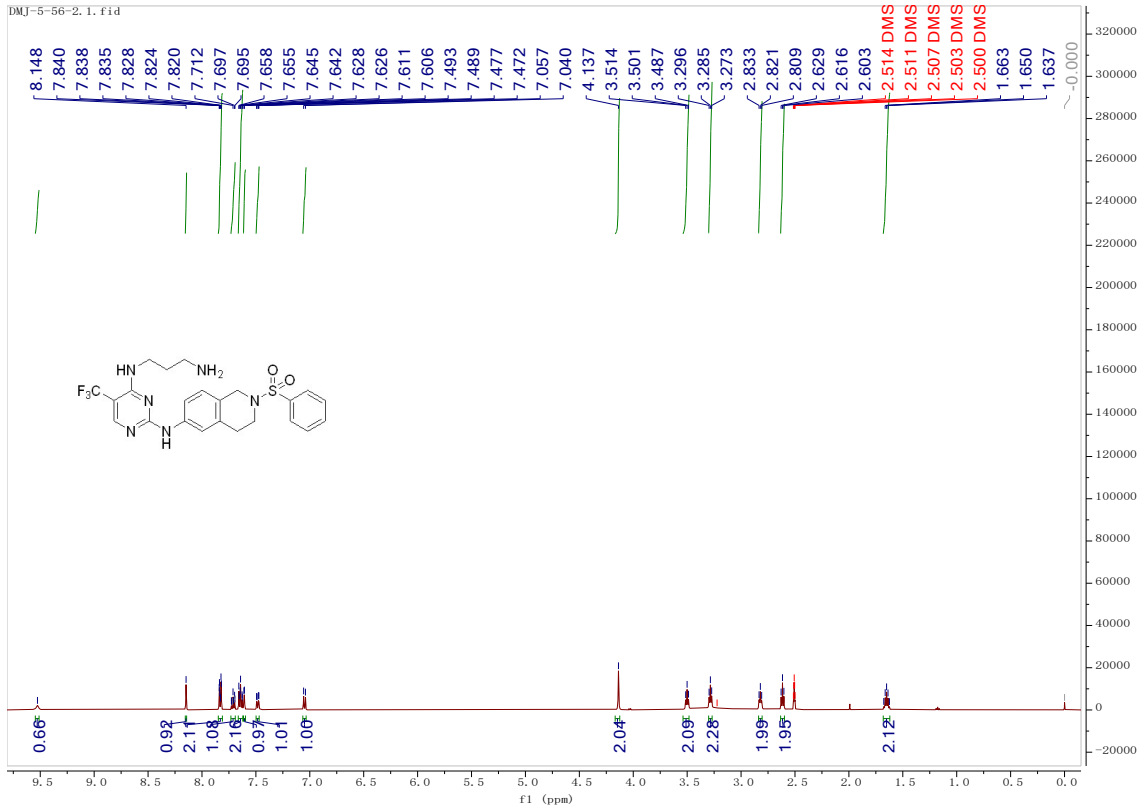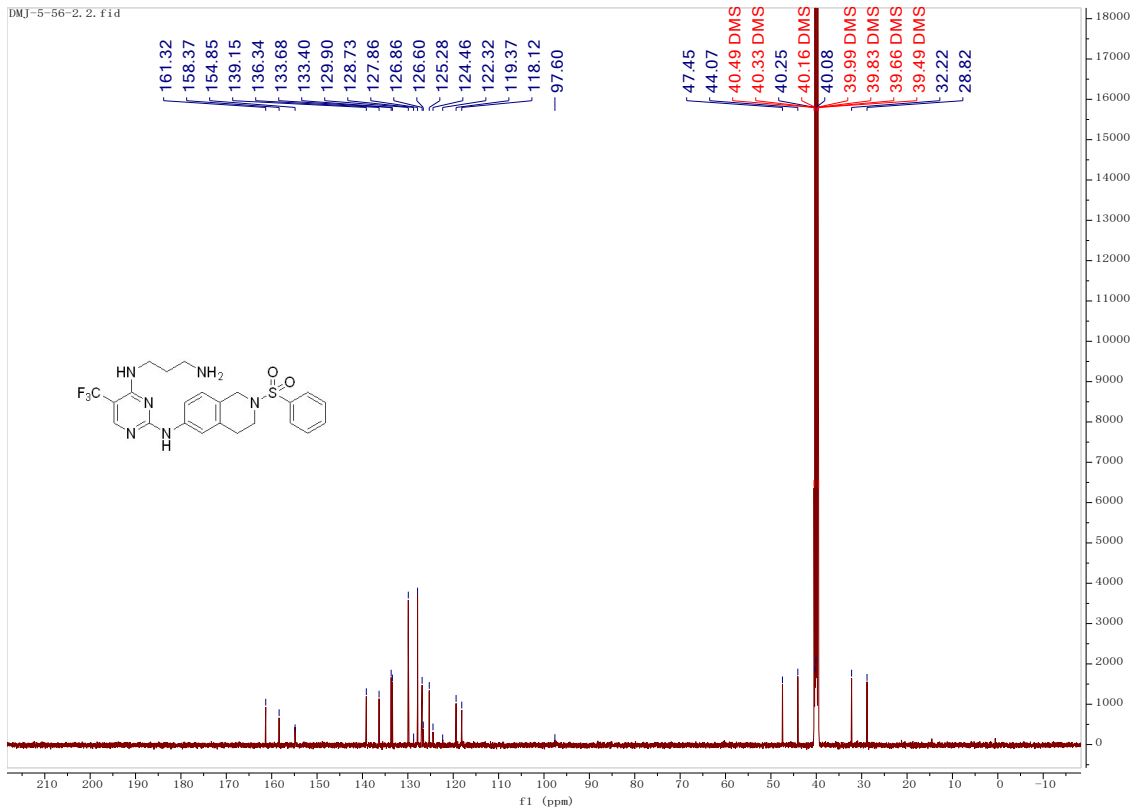

## HPLC methods and spectra

System: Agilent 1260 Series

Column: Cosmosil 5C18-AR-II column (4.6 mm × 250 mm)

Flow rate: 1.0 mL/min

### Method A

| t (min) | mobile phase A (%<br>CH <sub>3</sub> COONH <sub>4</sub> + 0.01%<br>CF <sub>3</sub> COOH) | mobile phase B (%<br>CH <sub>3</sub> OH) |
|---------|------------------------------------------------------------------------------------------|------------------------------------------|
| 0       | 70                                                                                       | 30                                       |
| 5       | 60                                                                                       | 40                                       |
| 10      | 30                                                                                       | 70                                       |
| 15      | 15                                                                                       | 85                                       |
| 20      | 5                                                                                        | 95                                       |
| 25      | 60                                                                                       | 40                                       |
| 30      | 70                                                                                       | 30                                       |

### Method B

| t (min) | mobile phase A (%<br>CF <sub>3</sub> COOH) | mobile phase B (%<br>CH <sub>3</sub> OH) |
|---------|--------------------------------------------|------------------------------------------|
| 0       | 90                                         | 10                                       |
| 5       | 80                                         | 20                                       |
| 10      | 75                                         | 25                                       |
| 15      | 60                                         | 40                                       |
| 20      | 40                                         | 60                                       |
| 25      | 50                                         | 50                                       |
| 30      | 90                                         | 10                                       |

6-((4-((3-aminopropyl)amino)-5-(trifluoromethyl)pyrimidin-2-yl)amino)-3,4-dihydronaphthalen-1(2H)-one

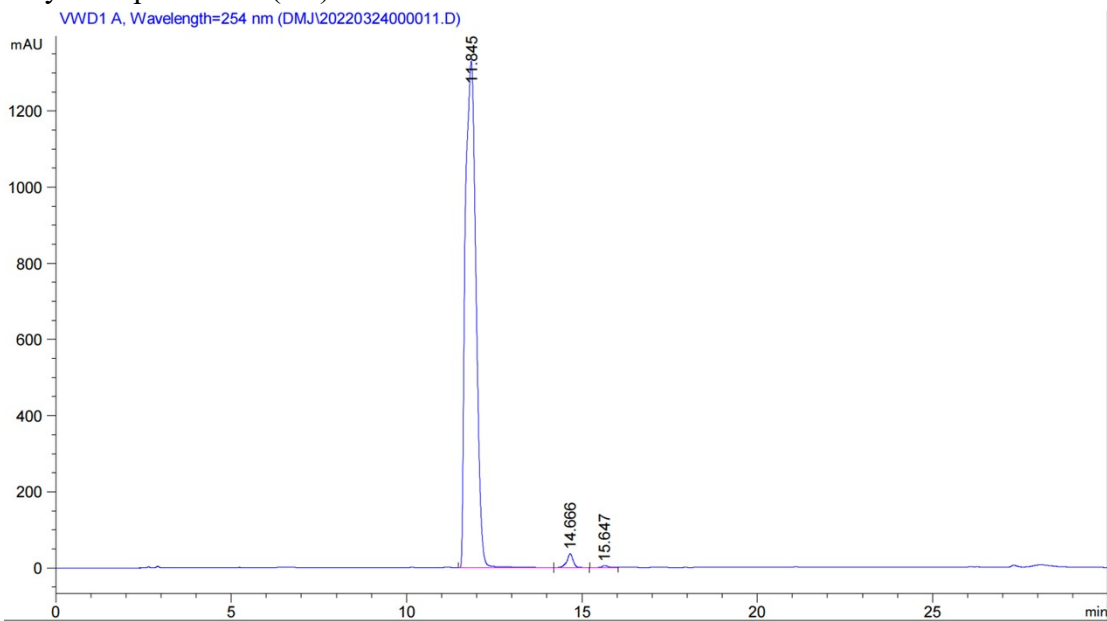

5-((4-((3-aminopropyl)amino)-5-(trifluoromethyl)pyrimidin-2-yl)amino)-2,3-dihydro-1H-inden-1-one

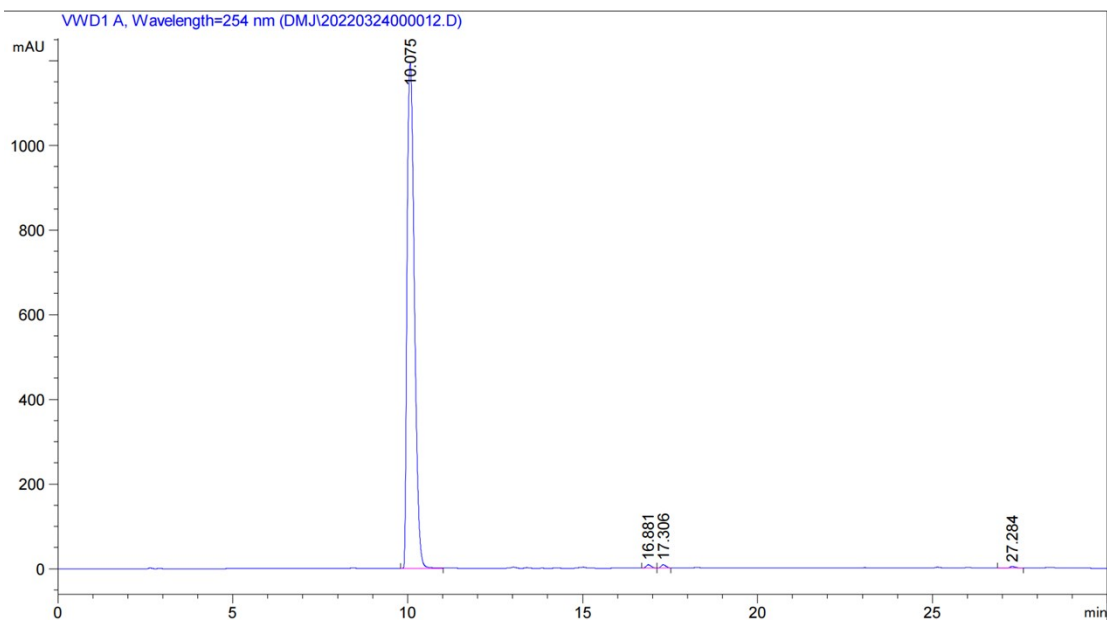

7-((4-((3-aminopropyl)amino)-5-(trifluoromethyl)pyrimidin-2-yl)amino)chroman-4-one

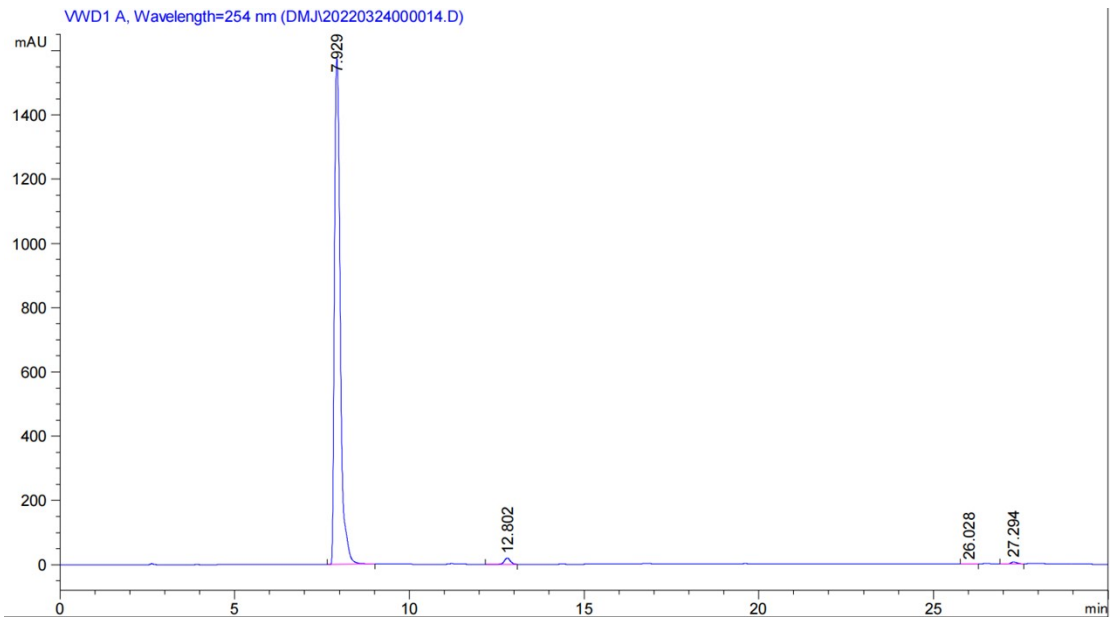

5-((4-((3-aminopropyl)amino)-5-(trifluoromethyl)pyrimidin-2-yl)amino)isobenzofuran-1(3H)-one

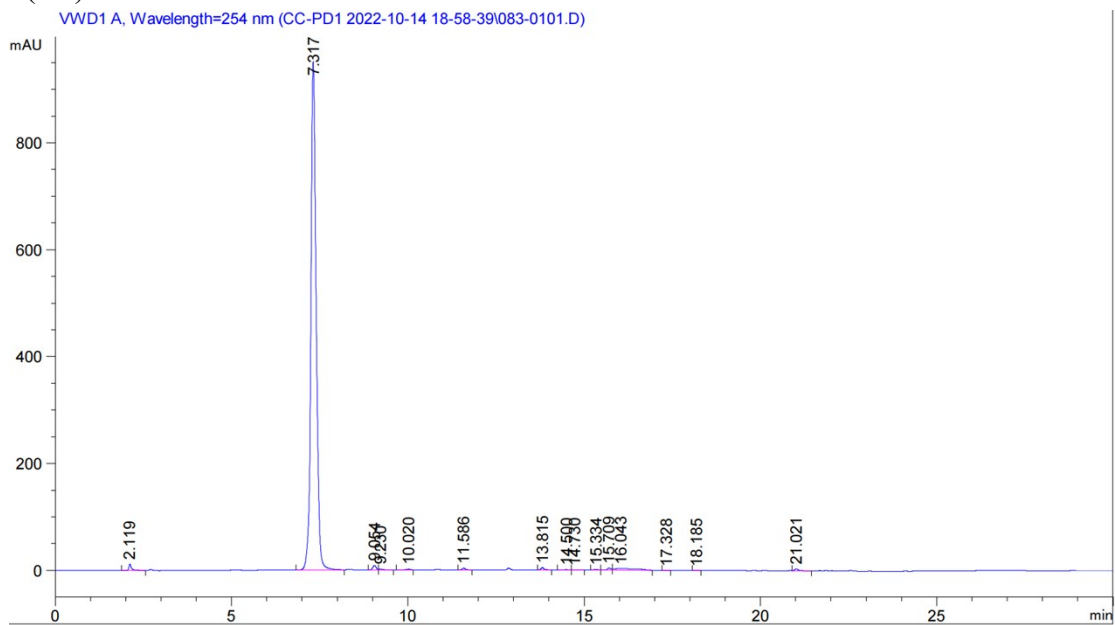

*N*<sup>4</sup>-(3-aminopropyl)-*N*<sup>2</sup>-(2,3-dihydrobenzo[*b*][1,4]dioxin-6-yl)-5-(trifluoromethyl)pyrimidine-2,4-diamine

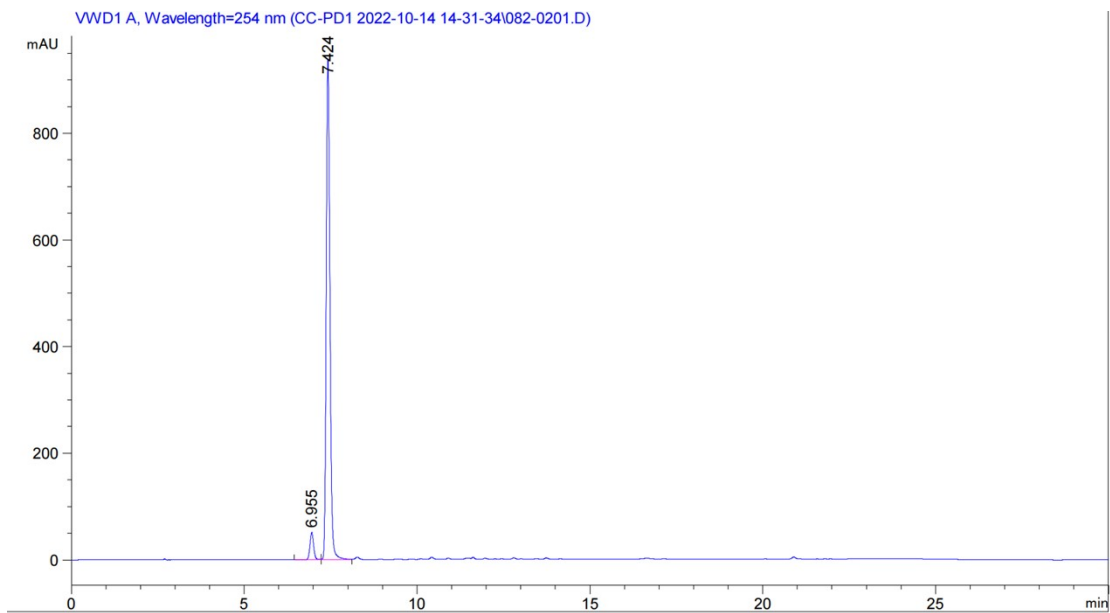

*N*<sup>4</sup>-(3-aminopropyl)-*N*<sup>2</sup>-(benzo[*d*][1,3]dioxol-5-yl)-5-(trifluoromethyl)pyrimidine-2,4-diamine

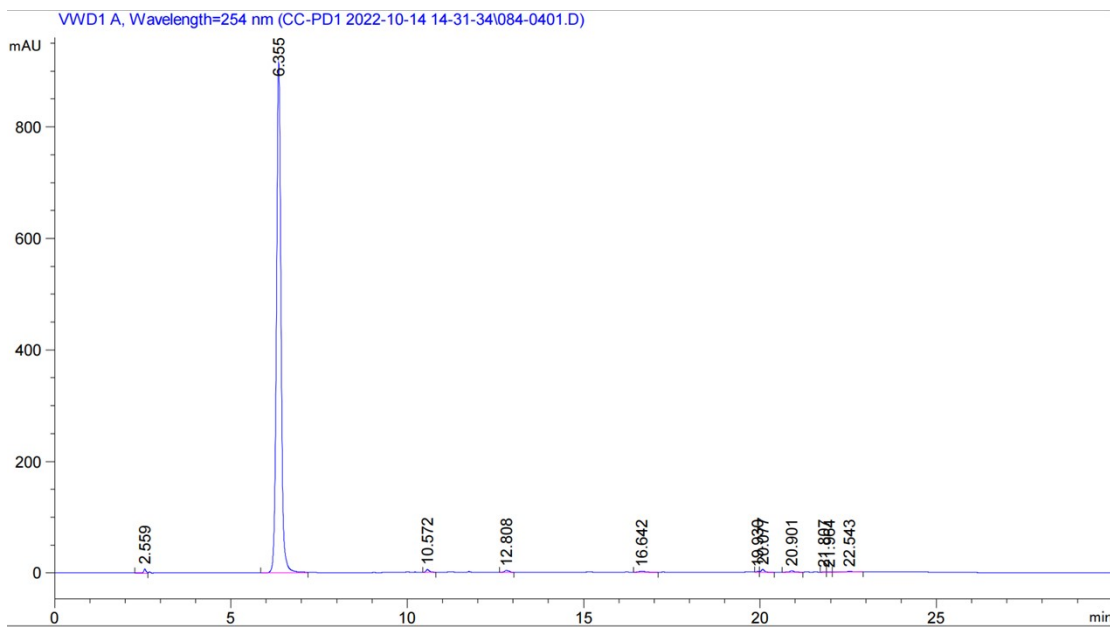

5-((4-((3-aminopropyl)amino)-5-(trifluoromethyl)pyrimidin-2-yl)amino)-2,3-dihydrobenzo[*b*]thiophene 1,1-dioxide

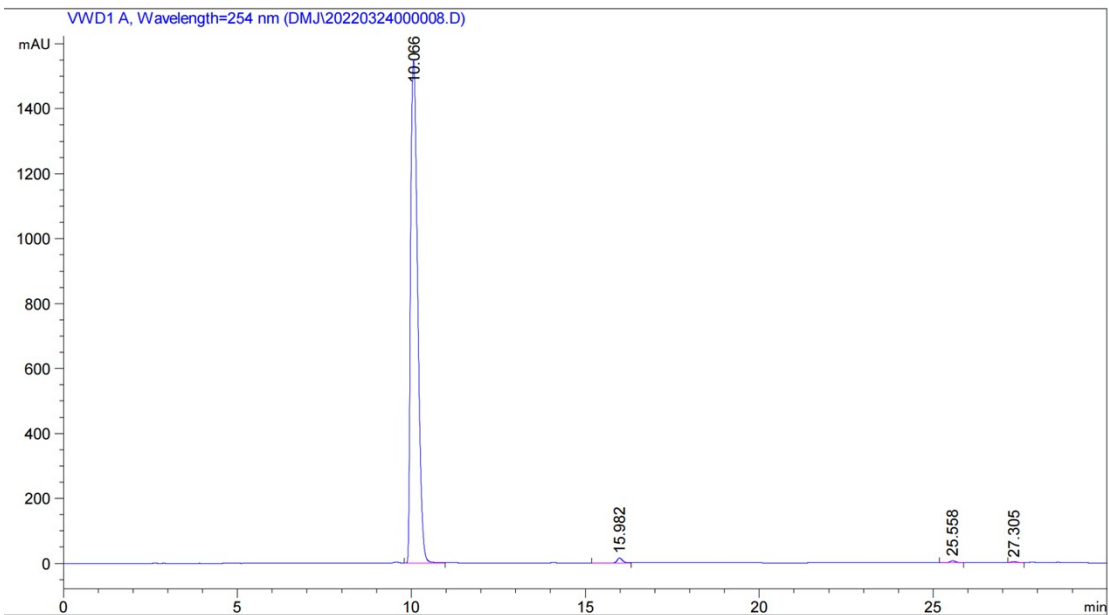

*N*<sup>4</sup>-(3-aminopropyl)-*N*<sup>2</sup>-(1-(methylsulfonyl)-1,2,3,4-tetrahydroquinolin-6-yl)-5-(trifluoromethyl)pyrimidine-2,4-diamine

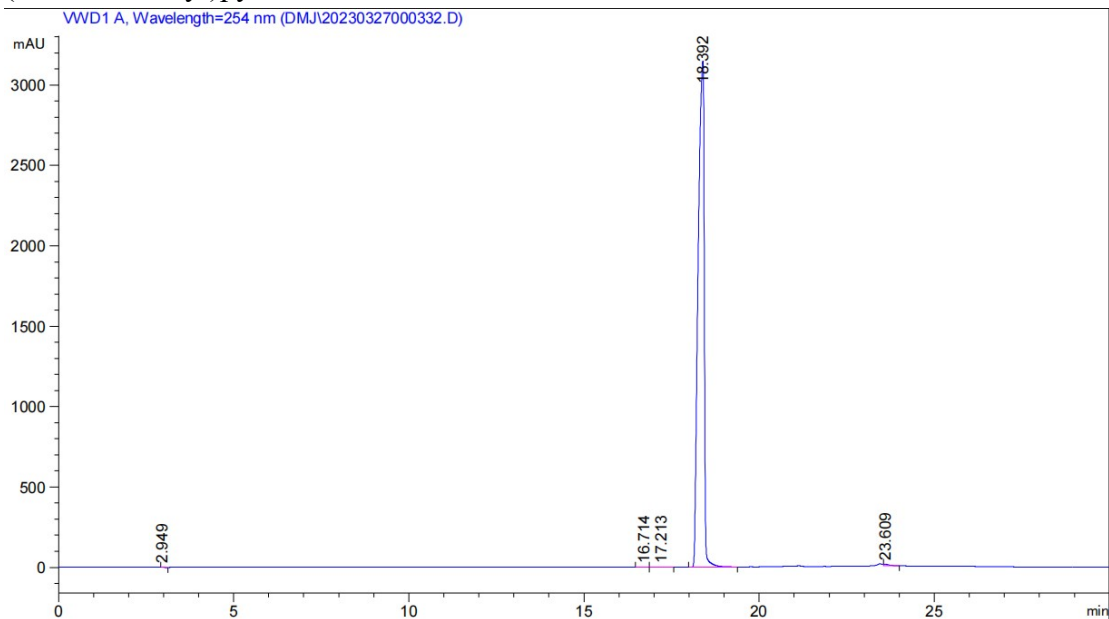

*N*<sup>4</sup>-(3-aminopropyl)-*N*<sup>2</sup>-(2-(methylsulfonyl)-1,2,3,4-tetrahydroisoquinolin-6-yl)-5-(trifluoromethyl)pyrimidine-2,4-diamine

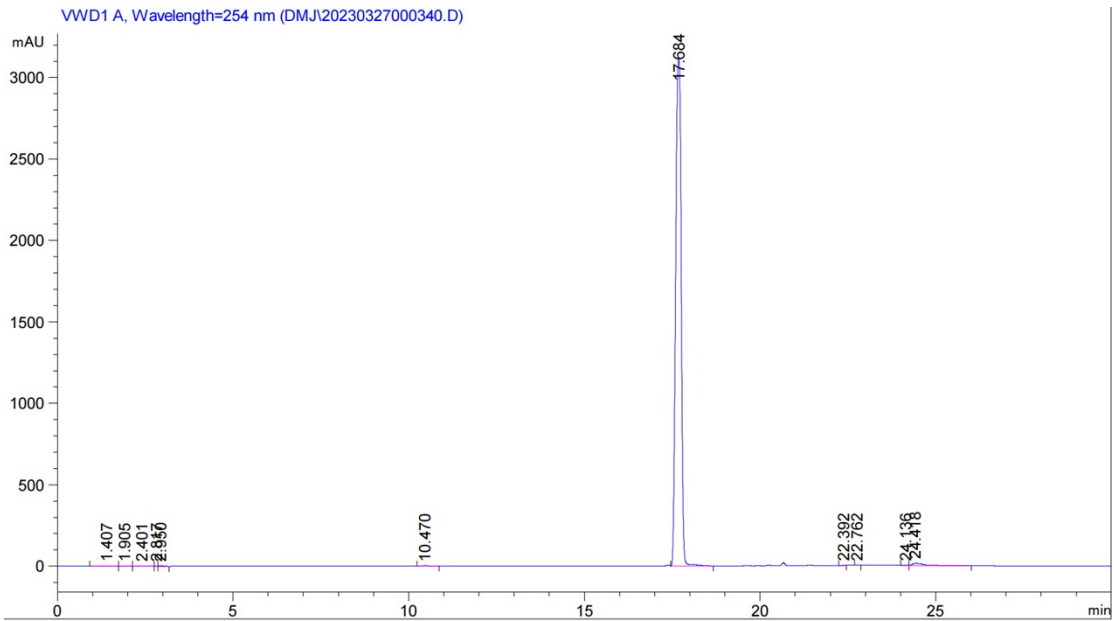

*N*<sup>4</sup>-(3-aminopropyl)-*N*<sup>2</sup>-(1-(methylsulfonyl)indolin-5-yl)-5-(trifluoromethyl)pyrimidine-2,4-diamine

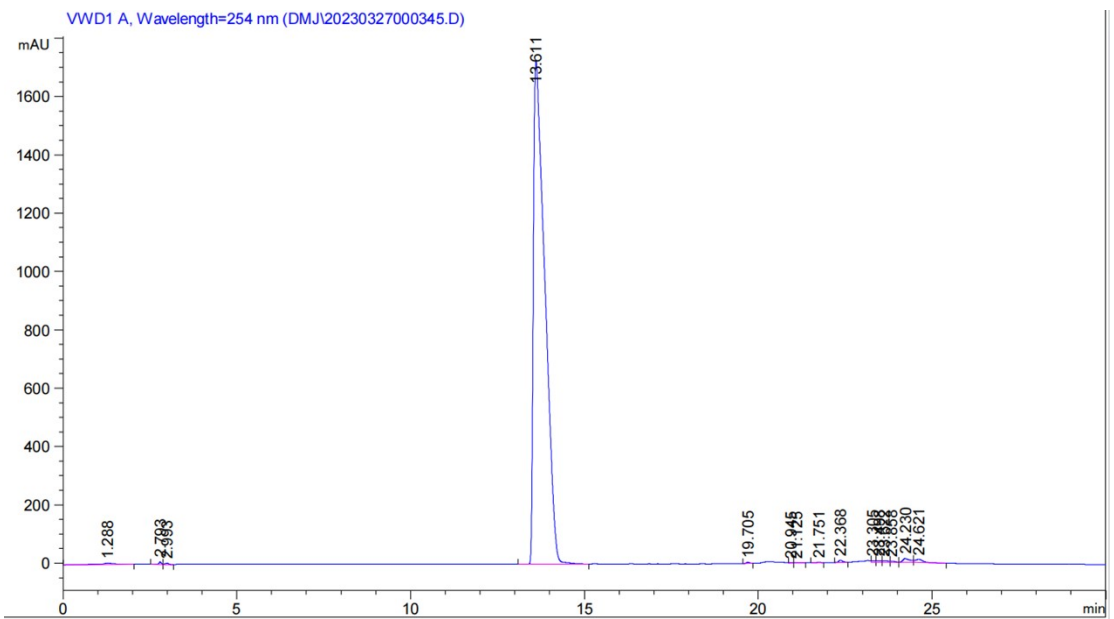

*N*<sup>4</sup>-(3-aminopropyl)-*N*<sup>2</sup>-(2-(methylsulfonyl)isoindolin-5-yl)-5-(trifluoromethyl)pyrimidine-2,4-diamine



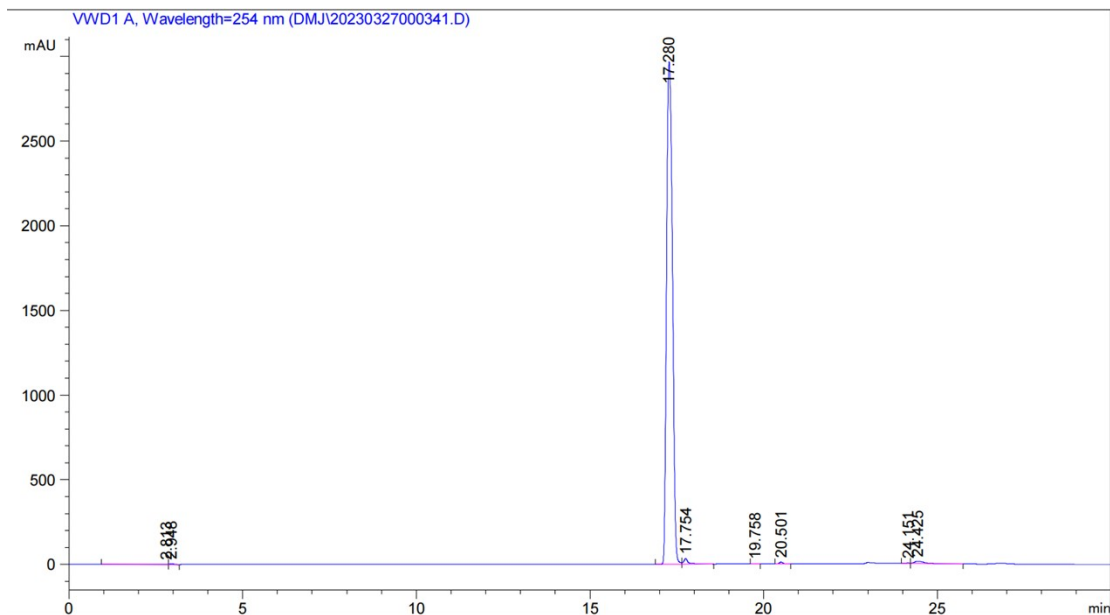

*N*<sup>4</sup>-(3-aminopropyl)-*N*<sup>2</sup>-(4-(methylsulfonyl)-3,4-dihydro-2*H*-benzo[*b*][1,4]oxazin-7-yl)-5-(trifluoromethyl)pyrimidine-2,4-diamine

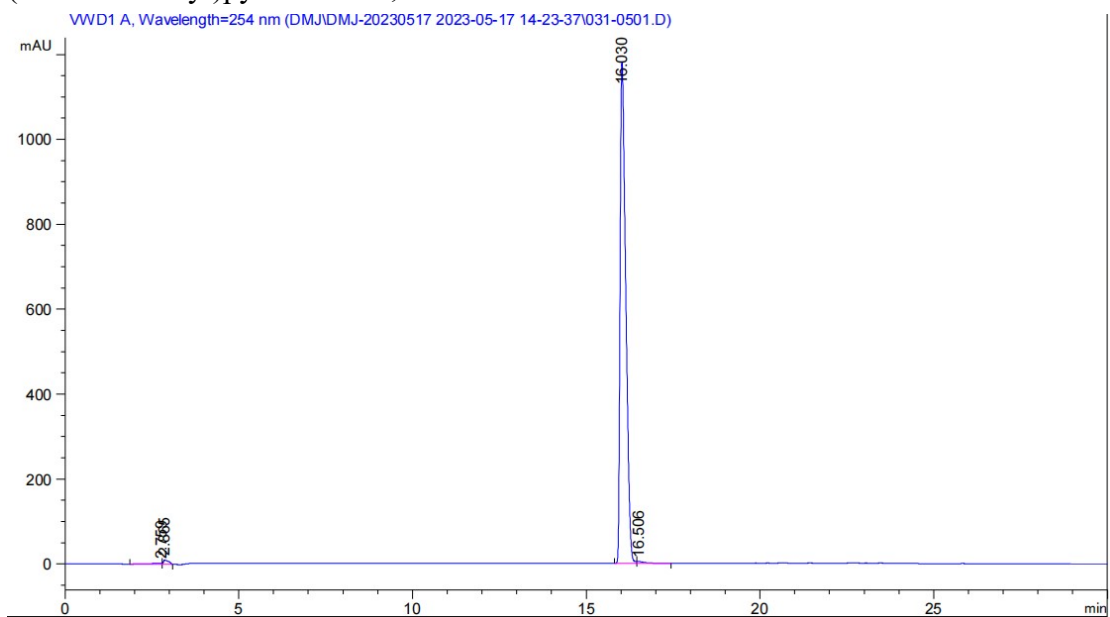

*N*<sup>4</sup>-(3-aminopropyl)-*N*<sup>2</sup>-(1-(ethylsulfonyl)-1,2,3,4-tetrahydroquinolin-6-yl)-5-(trifluoromethyl)pyrimidine-2,4-diamine

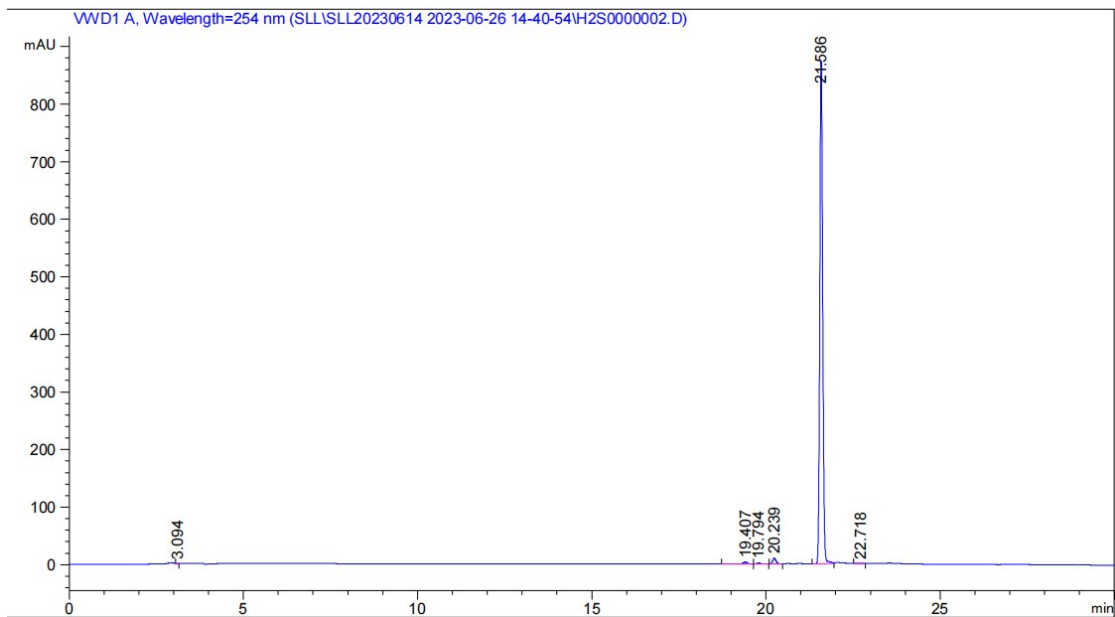

*N*<sup>4</sup>-(3-aminopropyl)-*N*<sup>2</sup>-(2-(ethylsulfonyl)-1,2,3,4-tetrahydroisoquinolin-6-yl)-5-(trifluoromethyl)pyrimidine-2,4-diamine

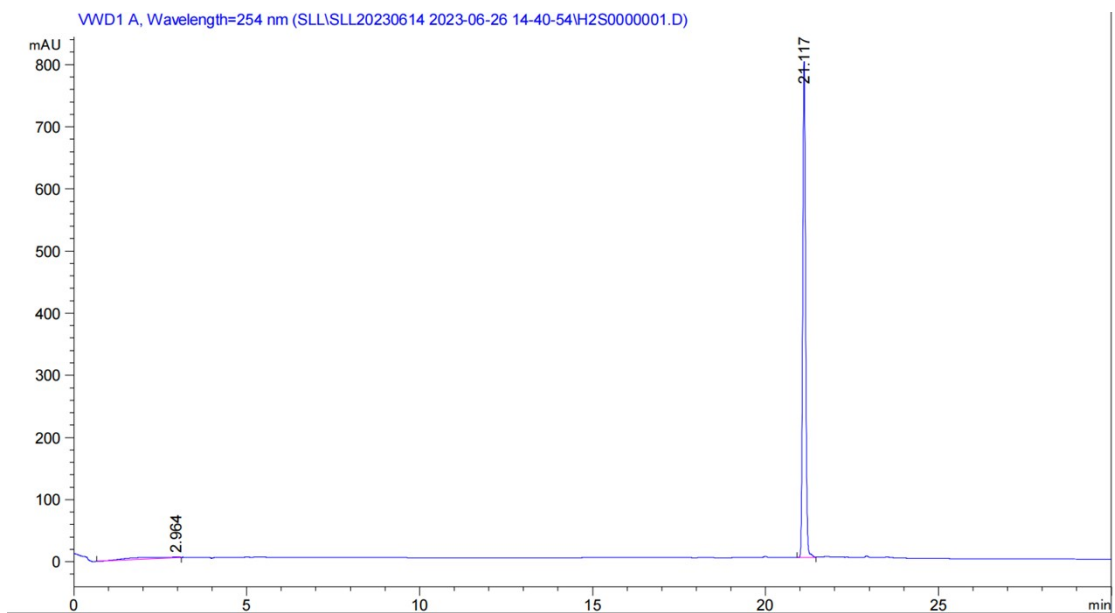

*N*<sup>4</sup>-(3-aminopropyl)-*N*<sup>2</sup>-(1-(cyclopropylsulfonyl)-1,2,3,4-tetrahydroquinolin-6-yl)-5-(trifluoromethyl)pyrimidine-2,4-diamine

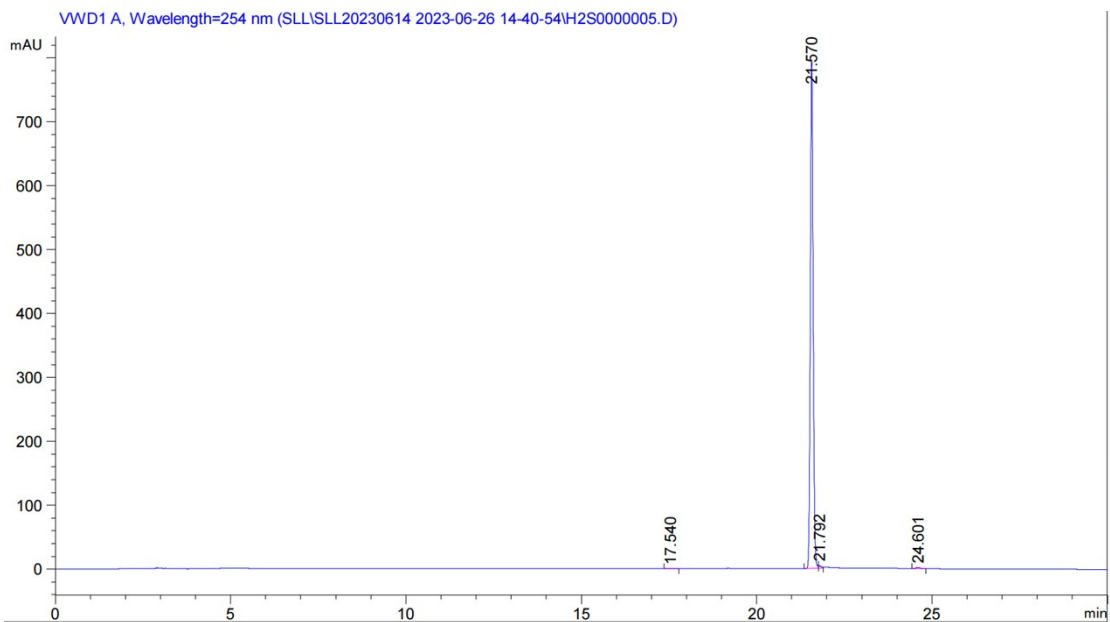

*N*<sup>4</sup>-(3-aminopropyl)-*N*<sup>2</sup>-(2-(cyclopropylsulfonyl)-1,2,3,4-tetrahydroisoquinolin-6-yl)-5-(trifluoromethyl)pyrimidine-2,4-diamine

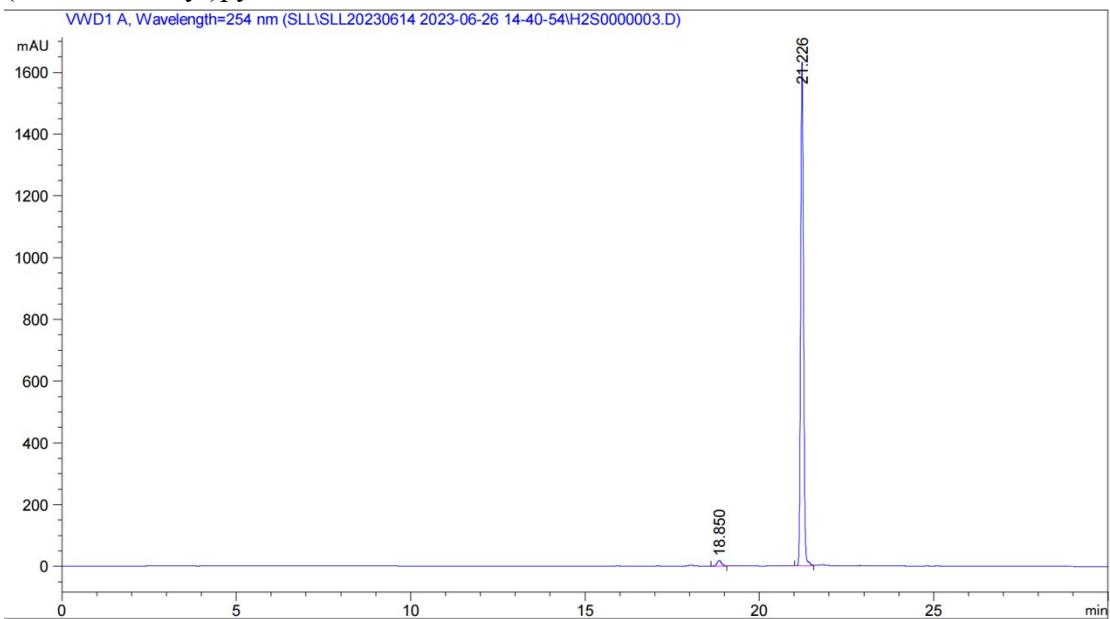

*N*<sup>4</sup>-(3-aminopropyl)-*N*<sup>2</sup>-(2-(cyclohexylsulfonyl)-1,2,3,4-tetrahydroisoquinolin-6-yl)-5-(trifluoromethyl)pyrimidine-2,4-diamine

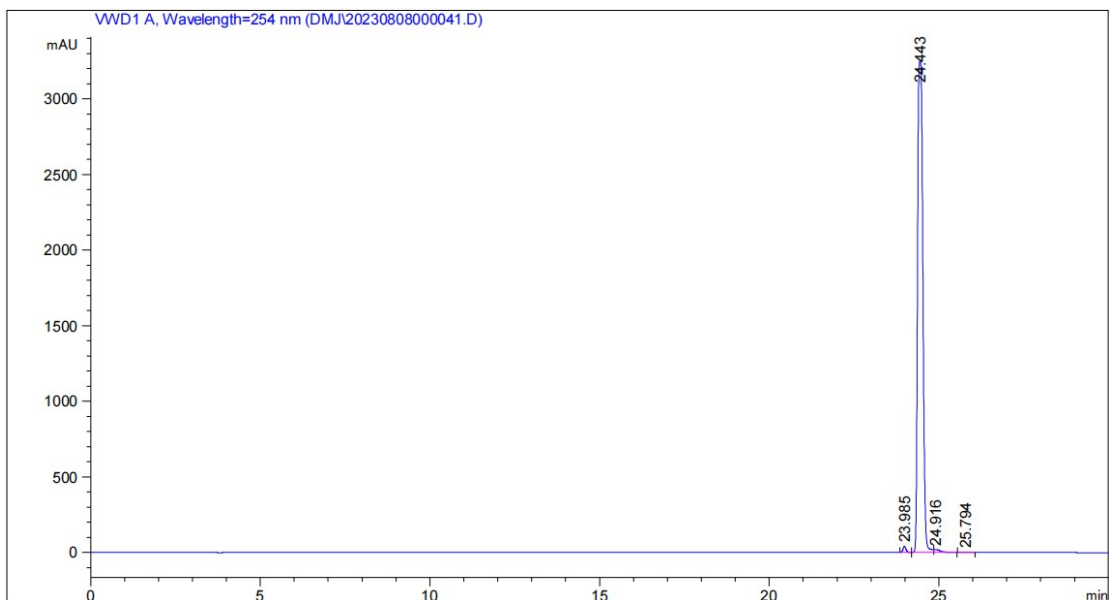

*N*<sup>4</sup>-(3-aminopropyl)-*N*<sup>2</sup>-(1-(phenylsulfonyl)-1,2,3,4-tetrahydroquinolin-6-yl)-5-(trifluoromethyl)pyrimidine-2,4-diamine

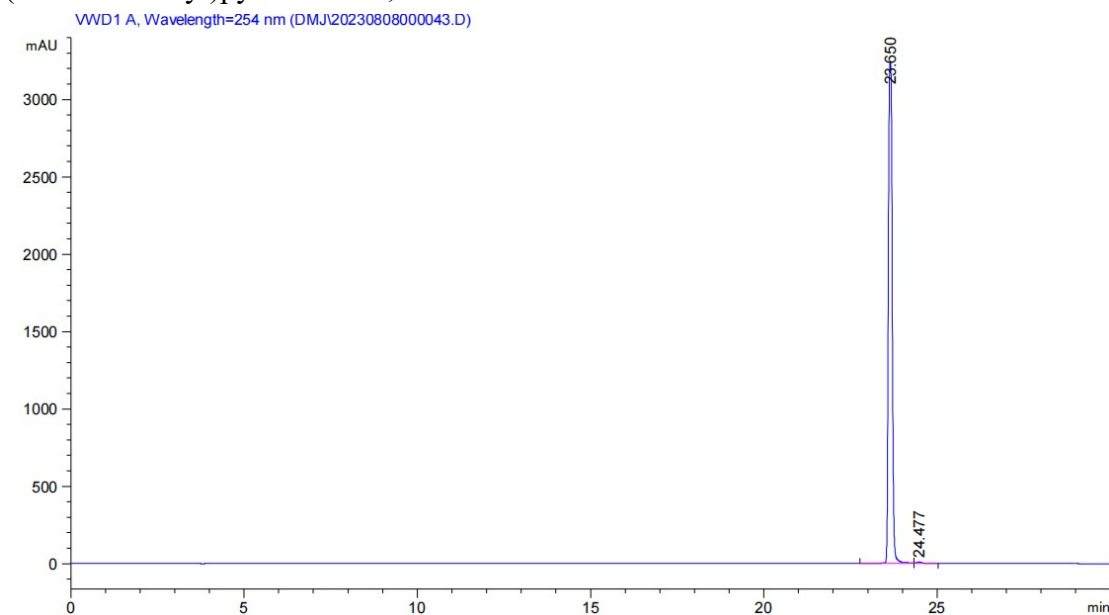

*N*<sup>4</sup>-(3-aminopropyl)-*N*<sup>2</sup>-(2-(phenylsulfonyl)-1,2,3,4-tetrahydroisoquinolin-6-yl)-5-(trifluoromethyl)pyrimidine-2,4-diamine

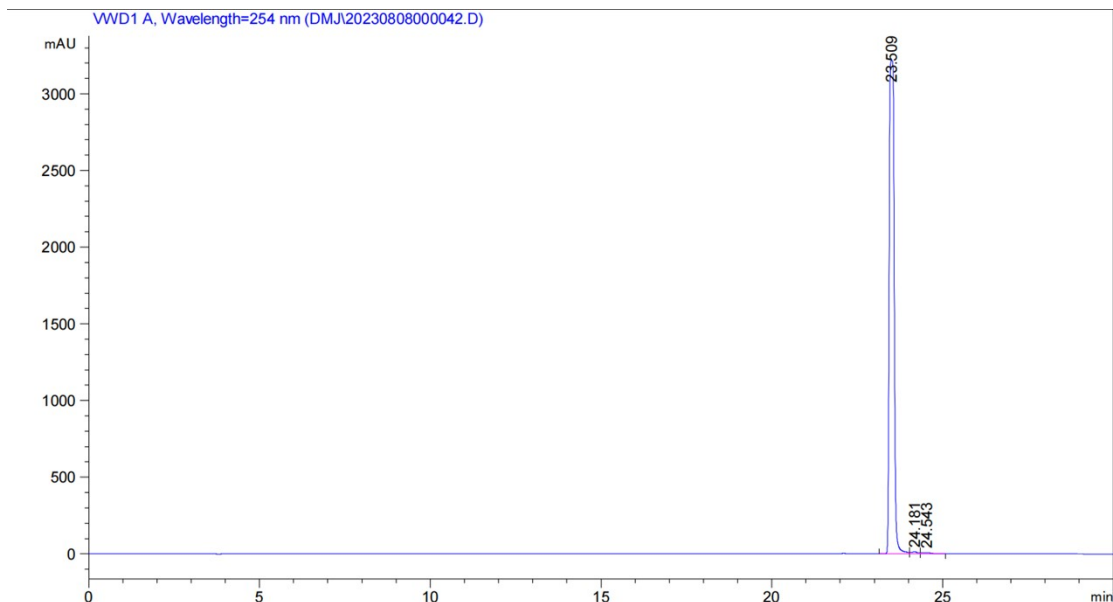

### HRMS spectra of representative compounds

6-((4-((3-aminopropyl)amino)-5-(trifluoromethyl)pyrimidin-2-yl)amino)-3,4-dihydronaphthalen-1(2H)-one

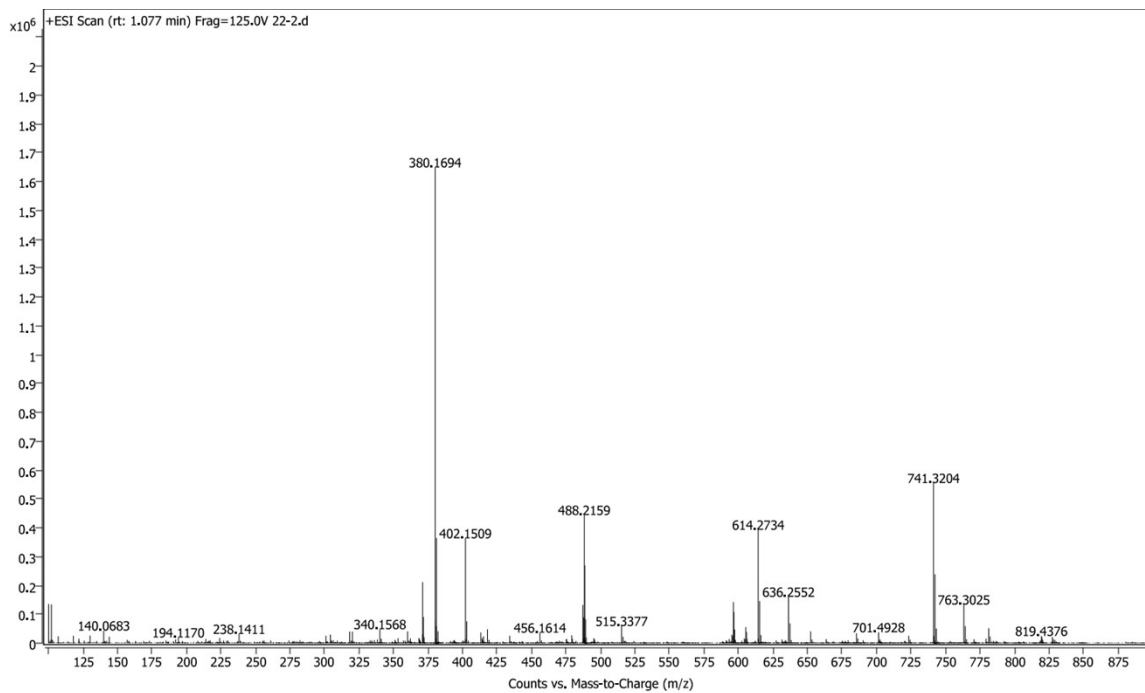

*N*<sup>4</sup>-(3-aminopropyl)-*N*<sup>2</sup>-(1-(methylsulfonyl)-1,2,3,4-tetrahydroquinolin-6-yl)-5-(trifluoromethyl)pyrimidine-2,4-diamine

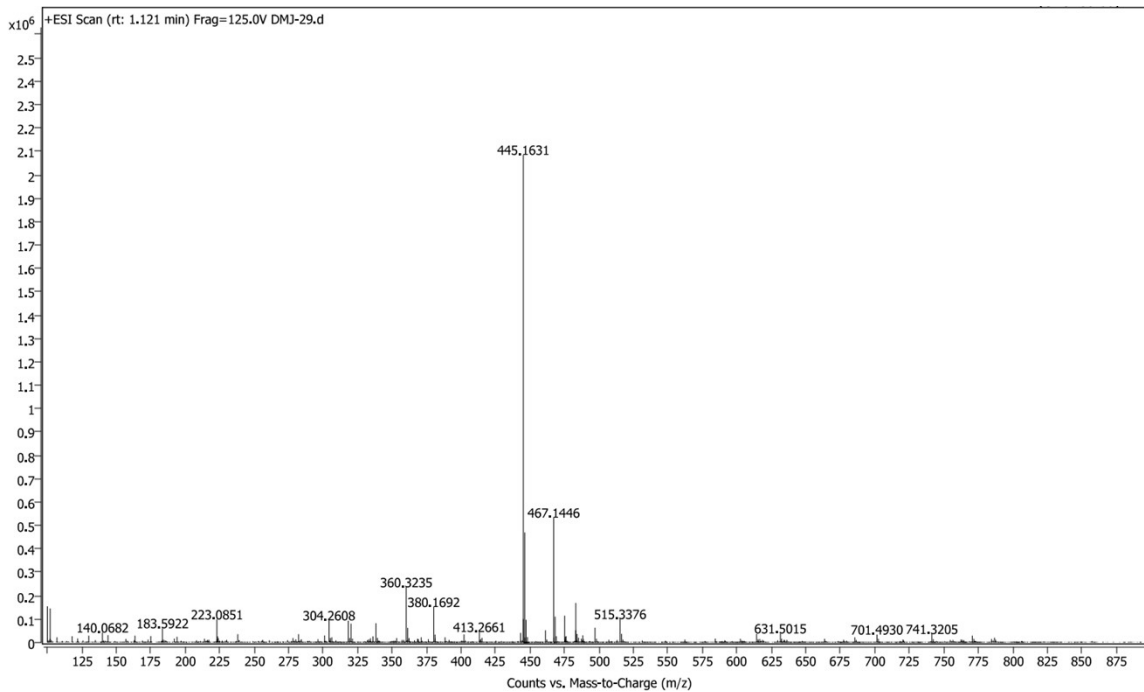

*N*<sup>4</sup>-(3-aminopropyl)-*N*<sup>2</sup>-(2-(methylsulfonyl)-1,2,3,4-tetrahydroisoquinolin-6-yl)-5-(trifluoromethyl)pyrimidine-2,4-diamine

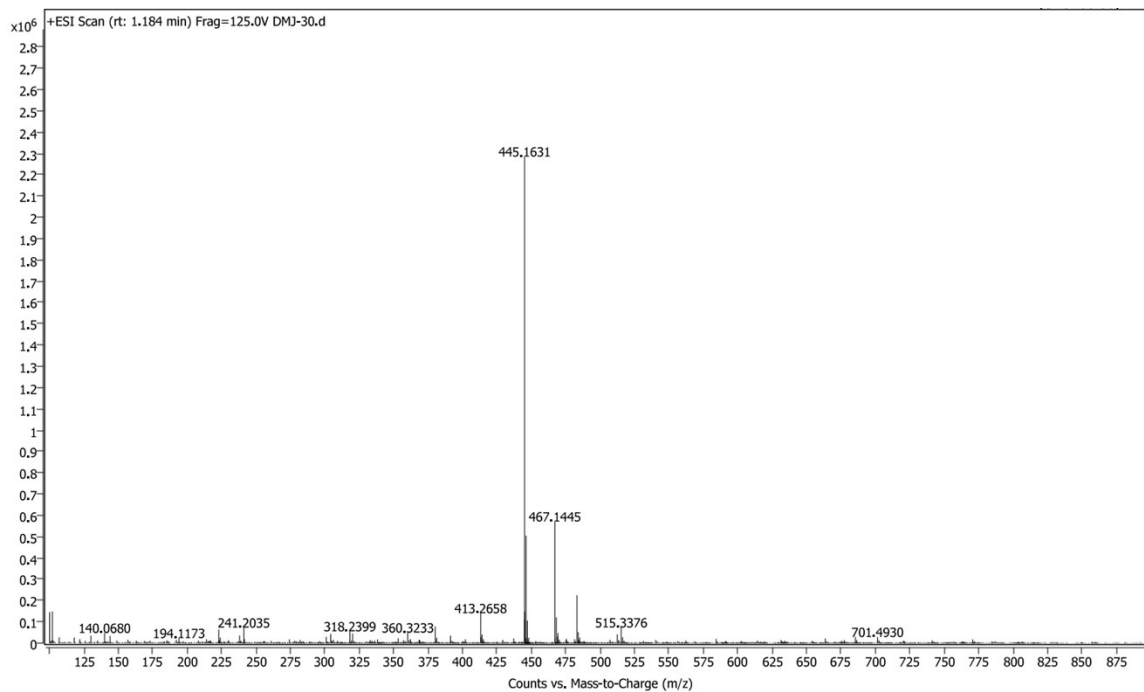

*N*<sup>4</sup>-(3-aminopropyl)-*N*<sup>2</sup>-(1-(methylsulfonyl)indolin-5-yl)-5-(trifluoromethyl)pyrimidine-2,4-diamine

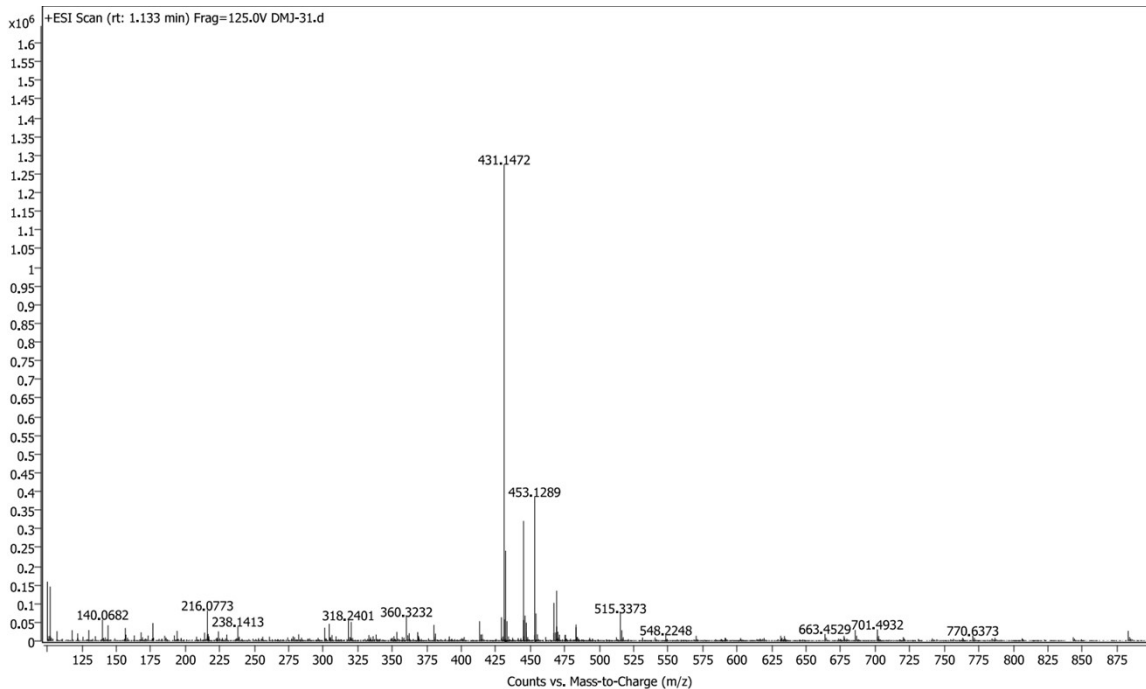

*N*<sup>4</sup>-(3-aminopropyl)-*N*<sup>2</sup>-(2-(methylsulfonyl)isoindolin-5-yl)-5-(trifluoromethyl)pyrimidine-2,4-diamine

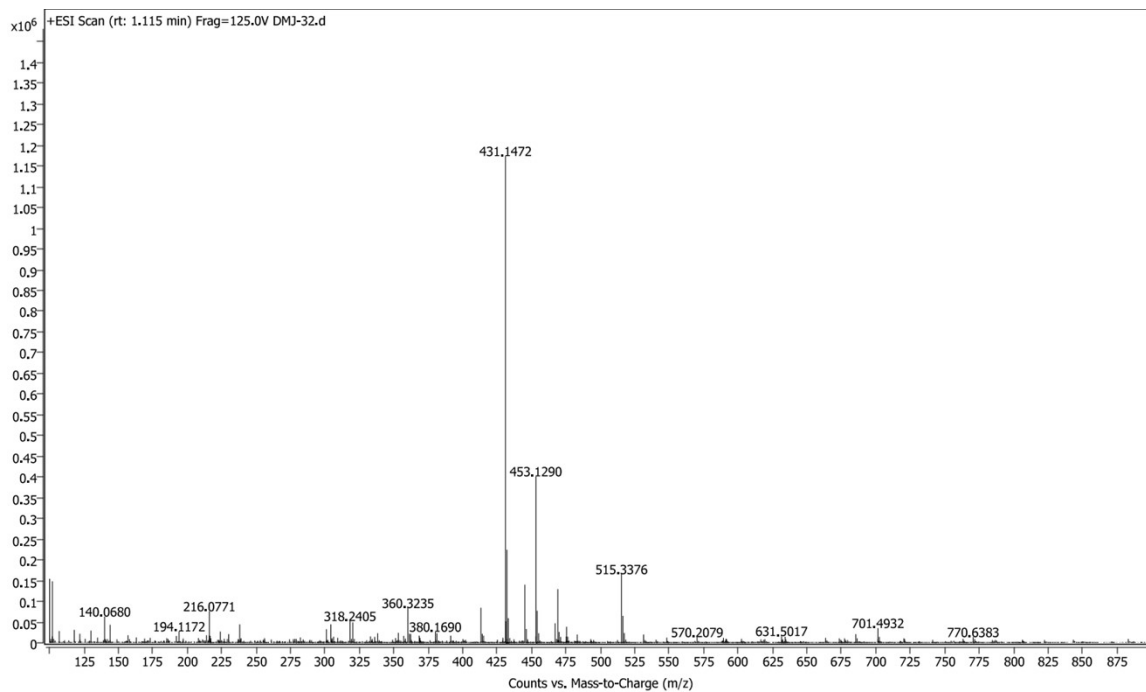

## List of abbreviations

hERG: human ether-a-go-go related gene

TEA: triethylamine

DCM: dichloromethane

m-CPBA: 3-chloroperbenzoic acid

ACN: acetonitrile

Pd<sub>2</sub>(dba)<sub>3</sub>: bis(dibenzylideneacetone)palladium

TFA: trifluoroacetic acid
